# Supplementary material for: Luminescent indium complexes with ONN-donor Schiff bases: syntheses, structures, and DFT investigations
Source: Royal Society of Chemistry journal article supplement (doi:10.1039/d4nj04755a), 2025-01-01
Supplement: d4nj04755a1.pdf [file d4nj04755a1.pdf]

Supporting Information

for

LUMINESCENT INDIUM COMPLEXES WITH ONN-DONOR SCHIFF BASES: SYNTHESIS,  
STRUCTURE, AND DFT INVESTIGATION

Irina V. Ershova<sup>a,\*</sup>, Svetlana V. Baryshnikova<sup>a</sup>, Maxim V. Arsenyev<sup>a</sup>, Alexey A. Belikov<sup>a</sup>, Ilya A. Yakushev<sup>b</sup>, Pavel V. Dorovatovskii<sup>c</sup>, Vasily A. Ilichev<sup>a</sup>, Sergey Yu. Ketkov<sup>a</sup>, Alexandr V. Piskunov<sup>a,\*</sup>

<sup>a</sup>*G. A. Razuvaev Institute of Organometallic Chemistry of Russian Academy of Sciences, 49 Tropinina str., 603950 Nizhny Novgorod, Russia*

<sup>b</sup>*N. S. Kurnakov Institute of General and Inorganic Chemistry, Russian Academy of Sciences, Leninskii prosp. 31, 119991 Moscow, Russia*

<sup>c</sup>*National Research Center 'Kurchatov Institute', Kurchatov sq. 1, 123182 Moscow, Russia*

**Table of contents**

|                                                                                                                         |              |
|-------------------------------------------------------------------------------------------------------------------------|--------------|
| <b>Table S1.</b> Crystallographic data and structure refinement details for <b>1-4</b>                                  | <b>2</b>     |
| <b>Table S2.</b> Selected Bond Lengths (Å) and Angles (°) in <b>1-4</b>                                                 | <b>3</b>     |
| <b>Figures S1-S6.</b> <sup>1</sup> H, <sup>13</sup> C NMR spectra of <b>1-4</b>                                         | <b>4-8</b>   |
| <b>Figures S7-S10.</b> 2-D NMR spectra (HSQC, HMBC) of <b>1-4</b>                                                       | <b>9-12</b>  |
| <b>Figures S11-S14.</b> DOSY spectra of <b>1-4</b>                                                                      | <b>13-14</b> |
| <b>Table S3.</b> Results of measurements of diffusion coefficient (D)                                                   | <b>15</b>    |
| <b>Figure S15.</b> Dependence of log <i>D</i> vs log <i>M<sub>w</sub></i>                                               | <b>16</b>    |
| <b>Figure S16.</b> UV-vis absorption spectra of <b>1-4</b> in organic solvents                                          | <b>17</b>    |
| <b>Table S4.</b> Electronic absorption spectral data of <b>1-4</b>                                                      | <b>17</b>    |
| <b>Figure S17.</b> UV-vis absorption spectra of <b>1-4</b> recorded in Nujol                                            | <b>18</b>    |
| <b>Figure S18.</b> PL spectra of <b>1-4</b> recorded in solid state and in DCM solution                                 | <b>18</b>    |
| <b>Figures S19-S22.</b> UV-PL spectra of <b>1-4</b> in DCM                                                              | <b>19</b>    |
| <b>Figure S23.</b> Molecular graphs of the DFT-optimized <b>1</b> dimer (a) and monomers <b>1</b> (b) and <b>4</b> (c). | <b>20</b>    |
| <b>Figure S24.</b> Calculated absorption spectrum of the <b>1</b> dimer                                                 | <b>21</b>    |
| <b>Figures S25-S28.</b> IR spectra of <b>1-4</b>                                                                        | <b>22-23</b> |
| Atomic coordinates in the optimized structures of dimer <b>1</b> and <b>1</b> , <b>4</b> monomers                       | <b>24-31</b> |

---

\*Corresponding author: E-mail address: [irina@iomc.ras.ru](mailto:irina@iomc.ras.ru) (I.V. Ershova), [pial@iomc.ras.ru](mailto:pial@iomc.ras.ru) (A.V. Piskunov)

**Table S1.** Crystallographic data and structure refinement details for **1-4**

| Compound                                                     | <b>1</b>                                                                      | <b>2</b>                                                                      | <b>3</b>                                                                                      | <b>4</b>                                                                      |
|--------------------------------------------------------------|-------------------------------------------------------------------------------|-------------------------------------------------------------------------------|-----------------------------------------------------------------------------------------------|-------------------------------------------------------------------------------|
| Empirical formula                                            | C <sub>28</sub> H <sub>30</sub> In <sub>2</sub> N <sub>4</sub> O <sub>2</sub> | C <sub>30</sub> H <sub>34</sub> In <sub>2</sub> N <sub>4</sub> O <sub>2</sub> | C <sub>28</sub> H <sub>28</sub> Cl <sub>2</sub> In <sub>2</sub> N <sub>4</sub> O <sub>2</sub> | C <sub>28</sub> H <sub>28</sub> In <sub>2</sub> N <sub>6</sub> O <sub>6</sub> |
| Formula weight                                               | 684.20                                                                        | 712.25                                                                        | 753.08                                                                                        | 774.20                                                                        |
| Temperature [K]                                              | 100(2)                                                                        | 100(2)                                                                        | 100(2)                                                                                        | 100(2)                                                                        |
| Wavelength [Å]                                               | 0.75268                                                                       | 0.71073                                                                       | 0.71073                                                                                       | 0.75268                                                                       |
| Crystal system                                               | Monoclinic                                                                    | Monoclinic                                                                    | Monoclinic                                                                                    | Triclinic                                                                     |
| Space group                                                  | <i>C2/c</i>                                                                   | <i>P2<sub>1</sub>/n</i>                                                       | <i>P2<sub>1</sub>/n</i>                                                                       | <i>P-1</i>                                                                    |
| Unit cell dimensions                                         |                                                                               |                                                                               |                                                                                               |                                                                               |
| <i>a</i> [Å]                                                 | 21.051(6)                                                                     | 8.6219(5)                                                                     | 8.5866(2)                                                                                     | 7.9004(19)                                                                    |
| <i>b</i> [Å]                                                 | 10.1465(9)                                                                    | 17.4483(11)                                                                   | 17.1574(5)                                                                                    | 8.4003(17)                                                                    |
| <i>c</i> [Å]                                                 | 13.0494(9)                                                                    | 9.7888(6)                                                                     | 9.9567(3)                                                                                     | 11.382(3)                                                                     |
| $\alpha$ [°]                                                 | 90                                                                            | 90                                                                            | 90                                                                                            | 77.261(5)                                                                     |
| $\beta$ [°]                                                  | 111.090(9)                                                                    | 102.362(2)                                                                    | 102.3870(10)                                                                                  | 82.036(18)                                                                    |
| $\gamma$ [°]                                                 | 90                                                                            | 90                                                                            | 90                                                                                            | 89.638(19)                                                                    |
| <i>V</i> [Å <sup>3</sup> ]                                   | 2600.6(8)                                                                     | 1438.46(15)                                                                   | 1432.71(7)                                                                                    | 729.4(3)                                                                      |
| <i>Z</i>                                                     | 4                                                                             | 2                                                                             | 2                                                                                             | 1                                                                             |
| <i>d</i> <sub>calc</sub> [g cm <sup>-3</sup> ]               | 1.748                                                                         | 1.644                                                                         | 1.746                                                                                         | 1.762                                                                         |
| $\mu$ [mm <sup>-1</sup> ]                                    | 2.094                                                                         | 1.636                                                                         | 1.829                                                                                         | 1.893                                                                         |
| <i>F</i> <sub>000</sub>                                      | 1360                                                                          | 712                                                                           | 744                                                                                           | 384                                                                           |
| Crystal dimensions [mm <sup>3</sup> ]                        | 0.09 × 0.05 × 0.03                                                            | 0.15 × 0.14 × 0.12                                                            | 0.24 × 0.20 × 0.04                                                                            | 0.06 × 0.05 × 0.02                                                            |
| $\theta$ range for data collection [°]                       | 2.393–26.644                                                                  | 2.335–30.532                                                                  | 2.374–30.503                                                                                  | 1.962–26.960                                                                  |
| Reflections collected                                        | 2277                                                                          | 21821                                                                         | 23889                                                                                         | 5470                                                                          |
| Independent reflections ( <i>R</i> <sub>int</sub> )          | 2277 ( <i>R</i> <sub>int</sub> = 0.0268)                                      | 4391 ( <i>R</i> <sub>int</sub> = 0.0563)                                      | 4384 ( <i>R</i> <sub>int</sub> = 0.0333)                                                      | 2549 ( <i>R</i> <sub>int</sub> = 0.0447)                                      |
| Completeness to $\theta$ [%]                                 | 99.0                                                                          | 100.0                                                                         | 100.0                                                                                         | 95.5                                                                          |
| Data/restraints/parameters                                   | 2277 / 0 / 166                                                                | 4391 / 0 / 175                                                                | 4384 / 0 / 174                                                                                | 2549 / 0 / 192                                                                |
| Final <i>R</i> indices [ <i>I</i> > 2 $\sigma$ ( <i>I</i> )] | <i>R</i> <sub>1</sub> = 0.0503                                                | <i>R</i> <sub>1</sub> = 0.0332                                                | <i>R</i> <sub>1</sub> = 0.0200                                                                | <i>R</i> <sub>1</sub> = 0.0378                                                |
|                                                              | <i>wR</i> <sub>2</sub> = 0.1394                                               | <i>wR</i> <sub>2</sub> = 0.0571                                               | <i>wR</i> <sub>2</sub> = 0.0467                                                               | <i>wR</i> <sub>2</sub> = 0.0888                                               |
| Final <i>R</i> indices (all data)                            | <i>R</i> <sub>1</sub> = 0.0566                                                | <i>R</i> <sub>1</sub> = 0.0515                                                | <i>R</i> <sub>1</sub> = 0.0256                                                                | <i>R</i> <sub>1</sub> = 0.0458                                                |
|                                                              | <i>wR</i> <sub>2</sub> = 0.1440                                               | <i>wR</i> <sub>2</sub> = 0.0635                                               | <i>wR</i> <sub>2</sub> = 0.0484                                                               | <i>wR</i> <sub>2</sub> = 0.0924                                               |
| <i>S</i> ( <i>F</i> <sup>2</sup> )                           | 1.096                                                                         | 1.038                                                                         | 1.066                                                                                         | 1.045                                                                         |
| Largest diff. peak and hole [e Å <sup>-3</sup> ]             | 1.562 / -1.352                                                                | 0.618 / -0.676                                                                | 0.464 / -0.395                                                                                | 1.325 / -1.169                                                                |

**Table S2.** Selected Bond Lengths (Å) and Angles (°) in **1-4**

|                   | <b>1</b>   | <b>2</b>   | <b>3</b>   | <b>4</b>   |
|-------------------|------------|------------|------------|------------|
| In(1)-O(1)        | 2.195(4)   | 2.1969(17) | 2.2004(11) | 2.232(4)   |
| In(1)-N(1)        | 2.414(5)   | 2.400(2)   | 2.3988(13) | 2.383(4)   |
| In(1)-N(2)        | 2.736(5)   | 2.697(2)   | 2.6725(14) | 2.591(4)   |
| In(1)-O(1A)       | 2.500(4)   | 2.5112(17) | 2.5404(11) | 2.657(3)   |
| C(1)-In(1)-C(2)   | 143.5(2)   | 144.89(11) | 145.14(8)  | 148.2(2)   |
| C(1)-In(1)-O(1)   | 103.45(19) | 106.04(9)  | 104.80(6)  | 102.57(18) |
| C(2)-In(1)-O(1)   | 108.3(2)   | 103.30(10) | 104.04(7)  | 98.64(19)  |
| C(1)-In(1)-N(1)   | 103.16(19) | 95.11(9)   | 95.08(6)   | 106.83(17) |
| C(2)-In(1)-N(1)   | 103.9(2)   | 112.36(9)  | 112.57(6)  | 102.38(17) |
| O(1)-In(1)-N(1)   | 70.98(15)  | 71.37(6)   | 71.12(4)   | 70.80(13)  |
| C(1)-In(1)-O(1A)  | 87.56(19)  | 84.78(8)   | 84.81(6)   | 83.12(16)  |
| C(2)-In(1)-O(1A)  | 87.8(2)    | 87.87(9)   | 87.68(6)   | 82.71(16)  |
| O(1)-In(1)-O(1A)  | 68.22(15)  | 69.47(7)   | 68.89(5)   | 68.96(13)  |
| N(1)-In(1)-O(1A)  | 139.19(15) | 139.11(6)  | 138.51(4)  | 139.74(13) |
| C(1)-In(1)-N(2)   | 84.6(2)    | 84.69(9)   | 85.14(6)   | 91.11(17)  |
| C(2)-In(1)-N(2)   | 85.4(2)    | 87.86(9)   | 87.85(6)   | 89.32(17)  |
| O(1)-In(1)-N(2)   | 135.31(15) | 135.33(6)  | 135.52(4)  | 136.91(13) |
| N(1)-In(1)-N(2)   | 64.41(16)  | 64.45(7)   | 64.80(4)   | 66.13(14)  |
| O(1A)-In(1)-N(2)  | 156.39(13) | 155.07(6)  | 155.43(4)  | 154.02(13) |
| In(1)-O(1)-In(1A) | 111.78(15) | 110.53(7)  | 111.11(5)  | 111.04(13) |

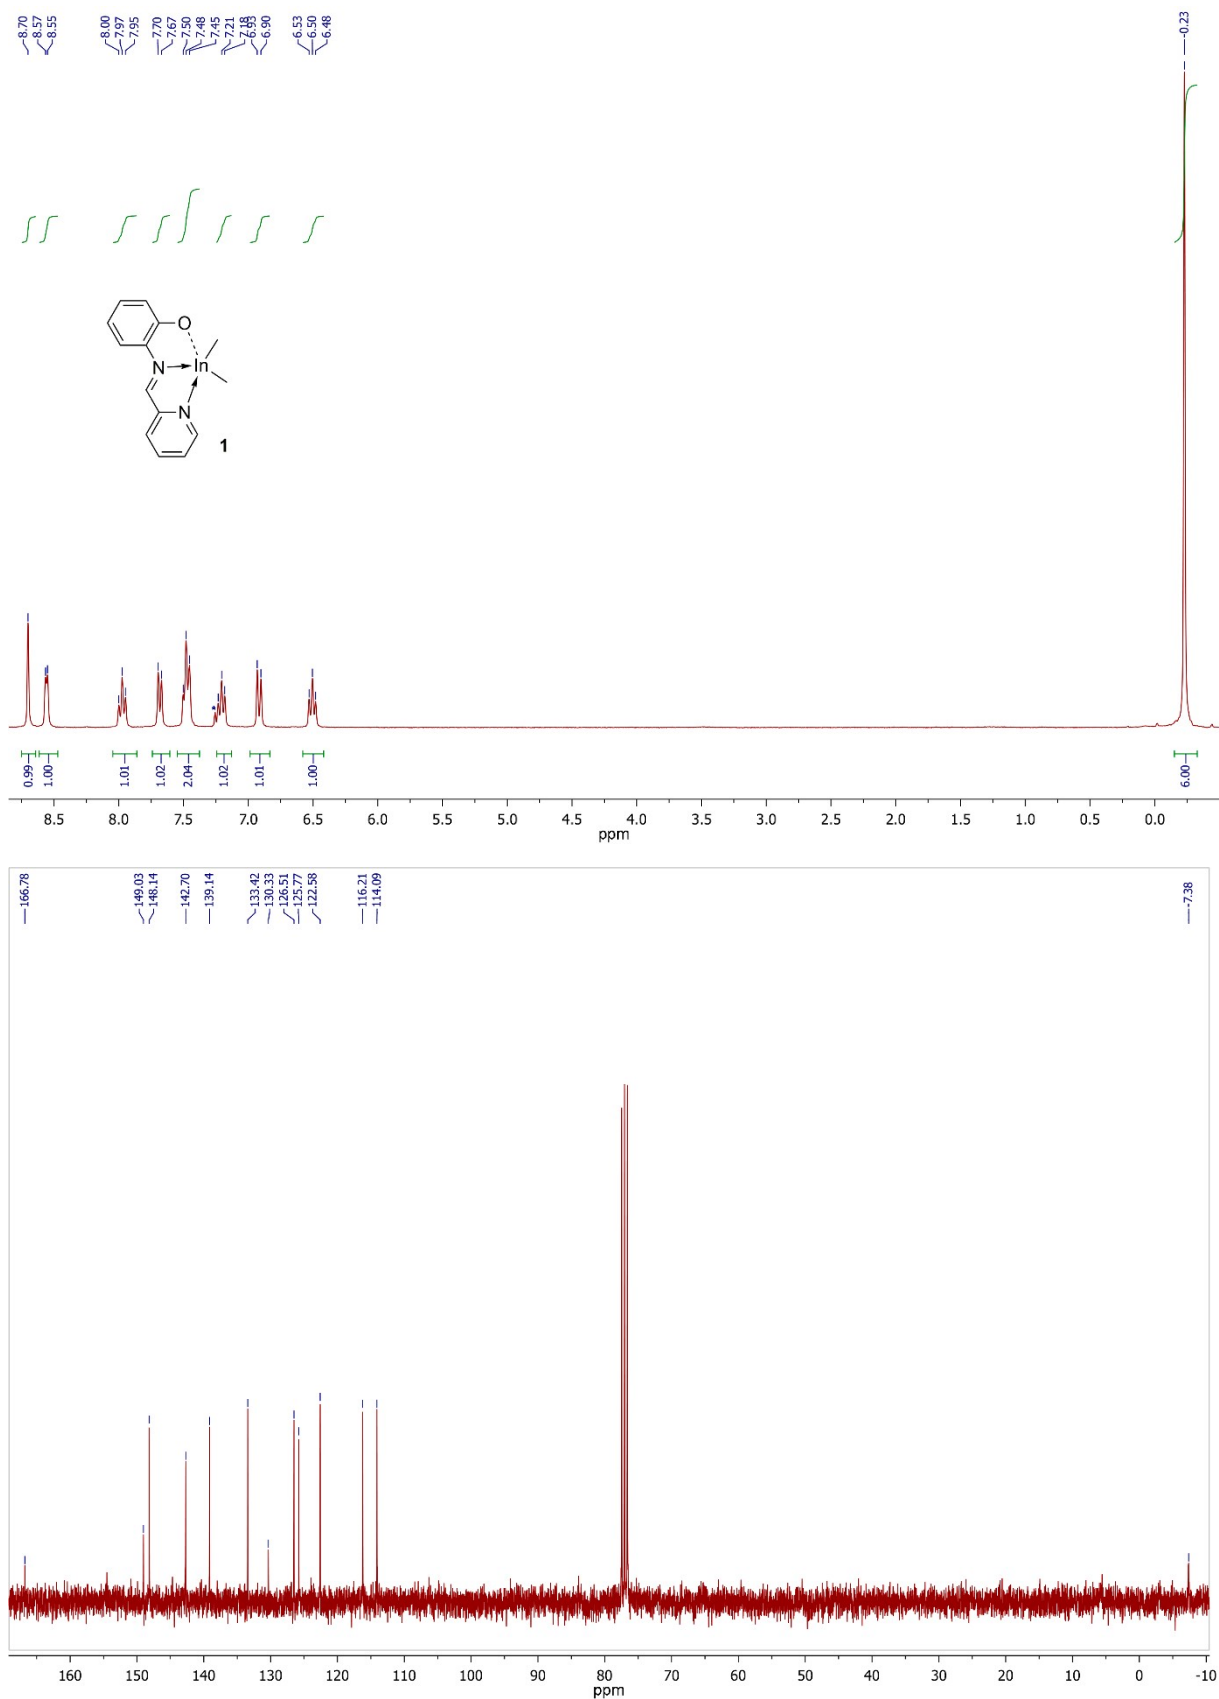

**Fig. S1.** <sup>1</sup>H (top) and <sup>13</sup>C (bottom) NMR spectra of **1** (\*from residual CHCl<sub>3</sub> in CDCl<sub>3</sub>).

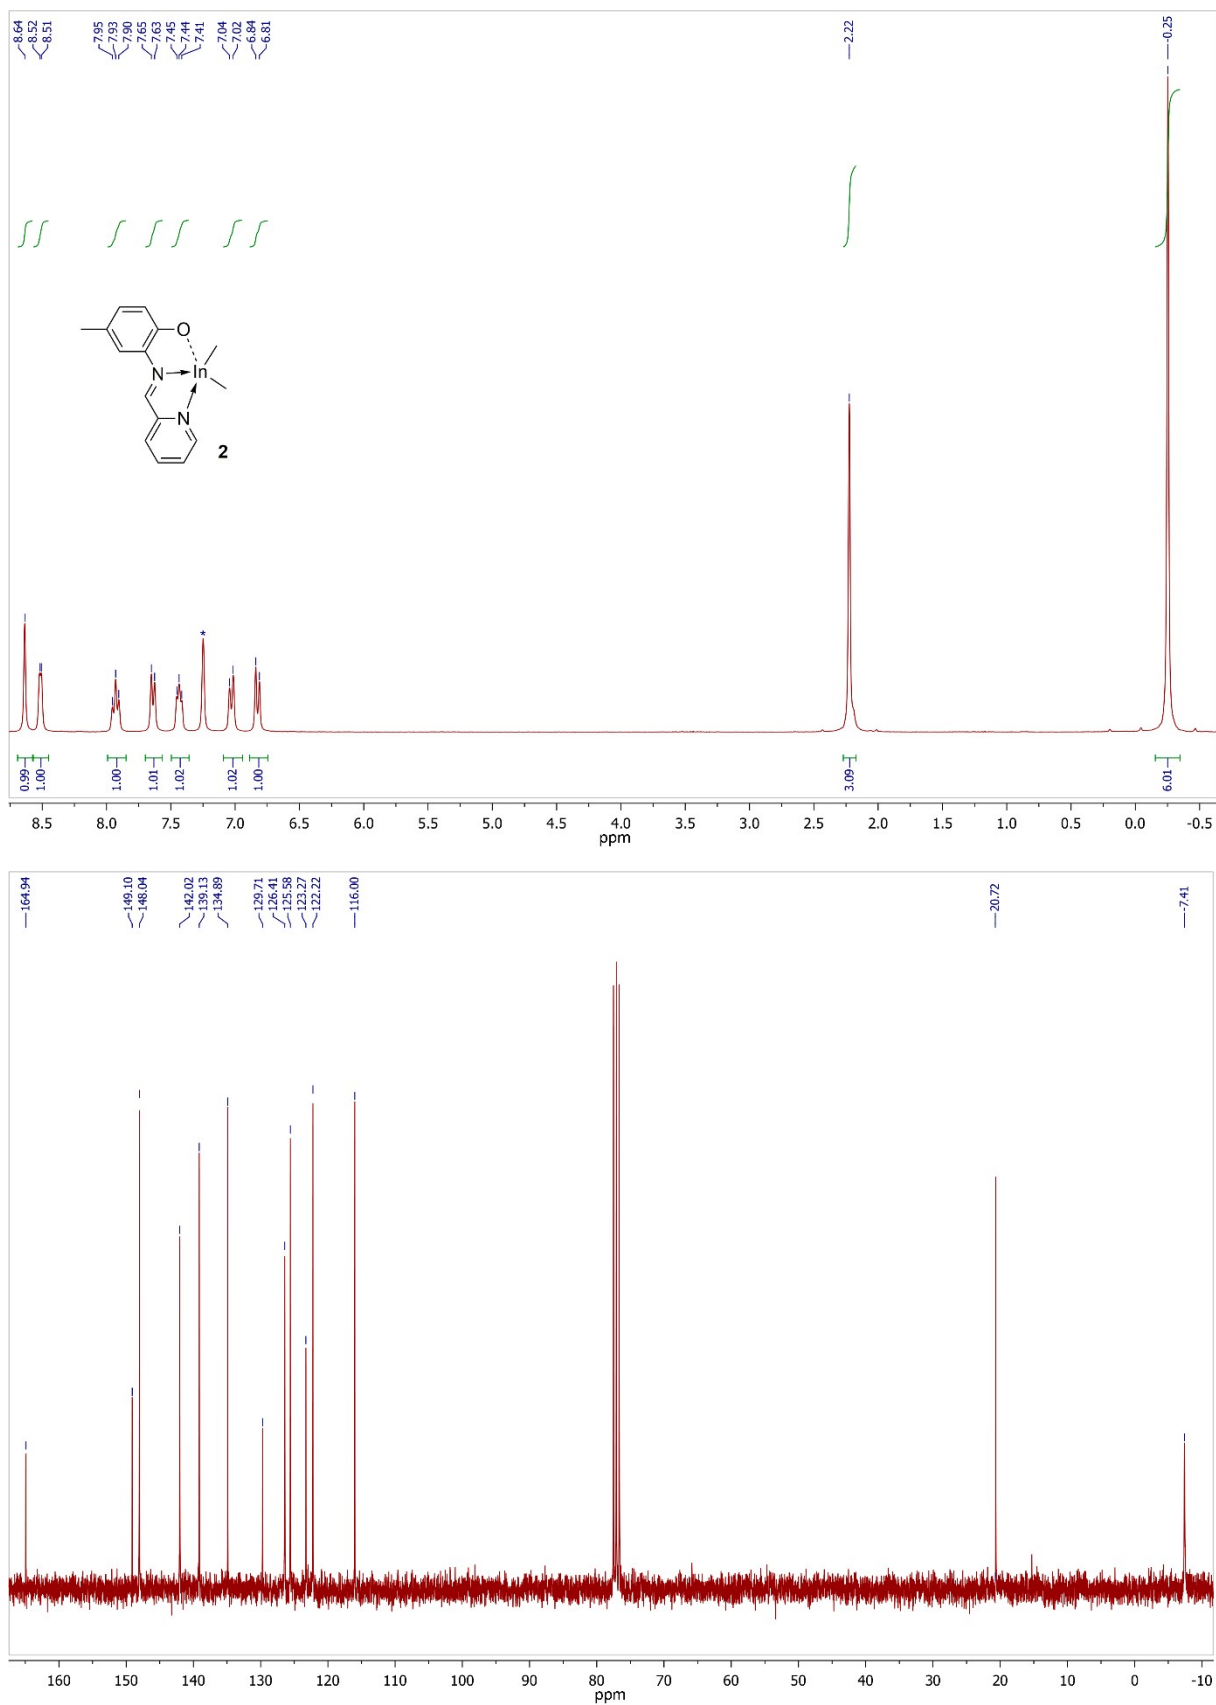

**Fig. S2.**  $^1\text{H}$  (top) and  $^{13}\text{C}$  (bottom) NMR spectra of **2** (\*from residual  $\text{CHCl}_3$  in  $\text{CDCl}_3$ ).

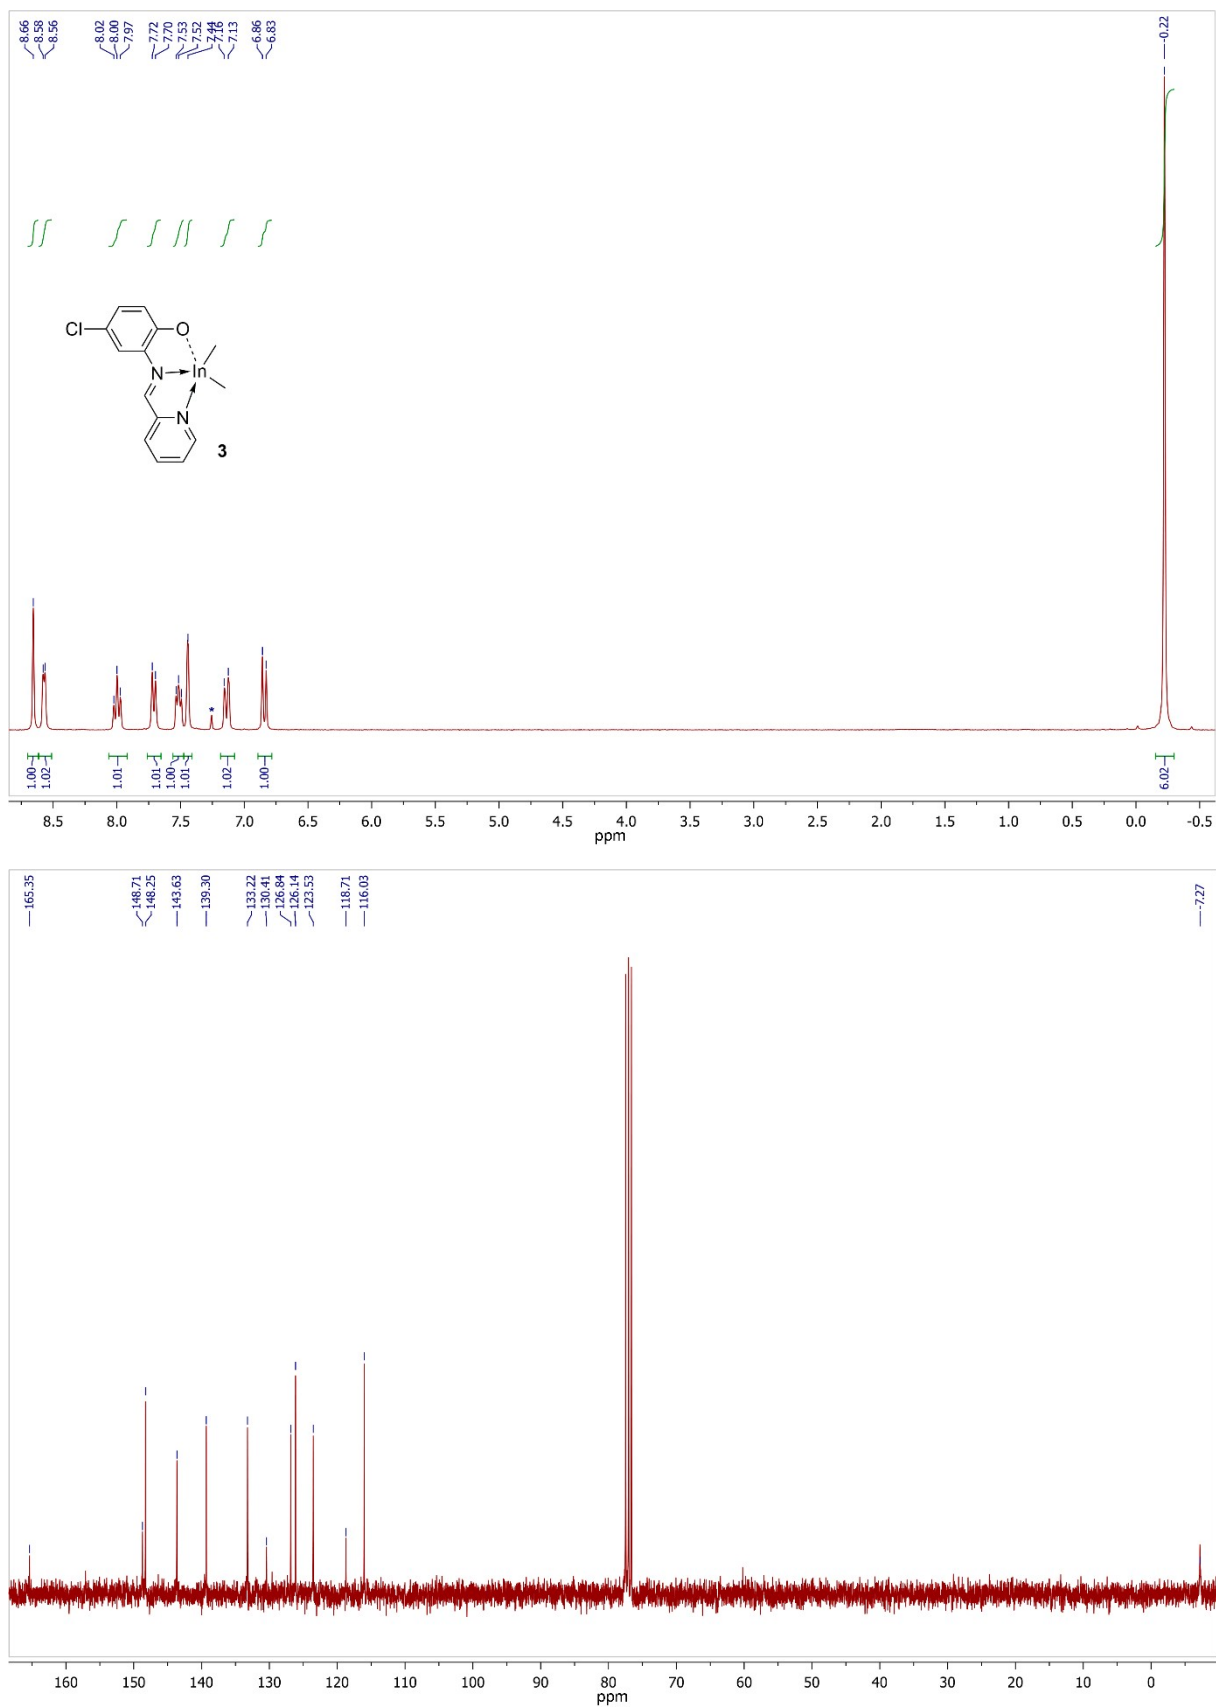

**Fig. S3.**  $^1\text{H}$  (top) and  $^{13}\text{C}$  (bottom) NMR spectra of **3** (\*from residual  $\text{CHCl}_3$  in  $\text{CDCl}_3$ ).

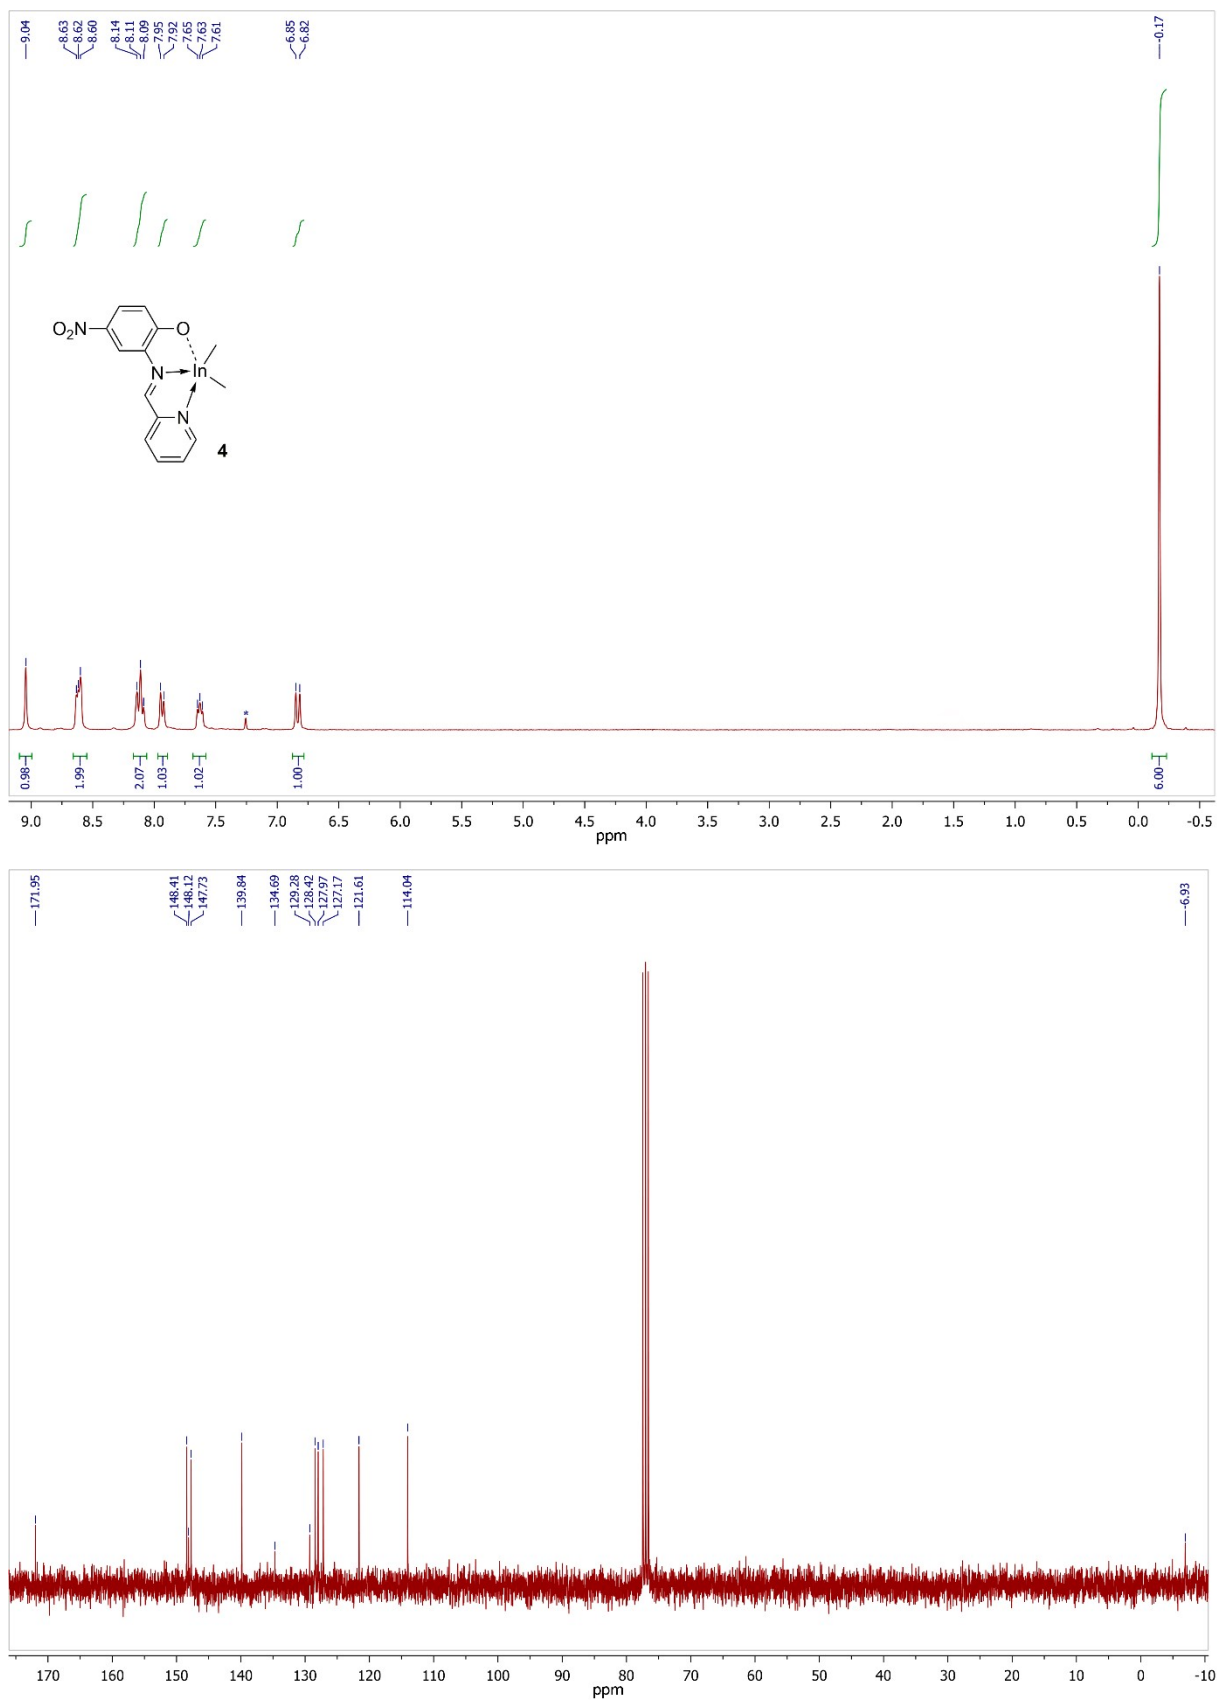

**Fig. S4.** <sup>1</sup>H (top) and <sup>13</sup>C (bottom) NMR spectra of **4** (\*from residual CHCl<sub>3</sub> in CDCl<sub>3</sub>).

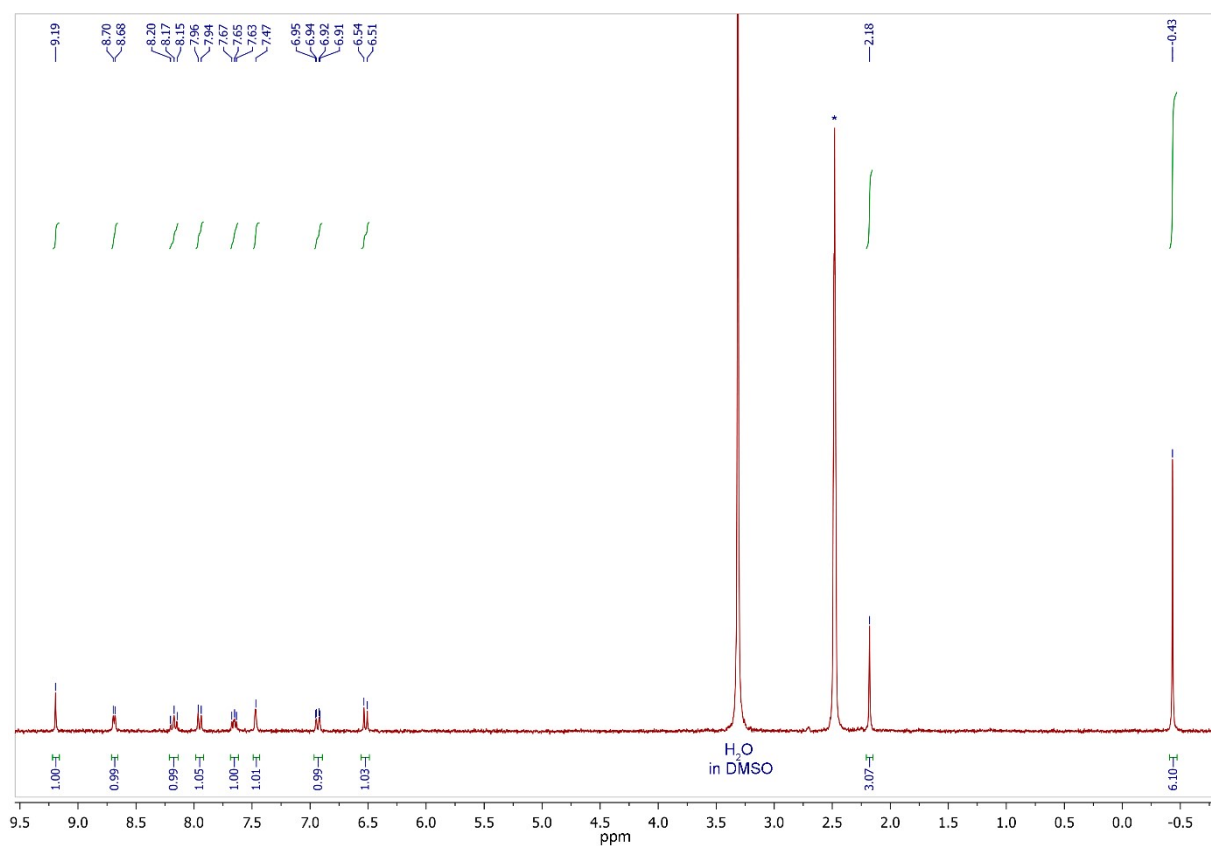

**Fig. S5.** <sup>1</sup>H NMR spectrum of **2** (\*from residual DMSO in DMSO-d<sub>6</sub>).

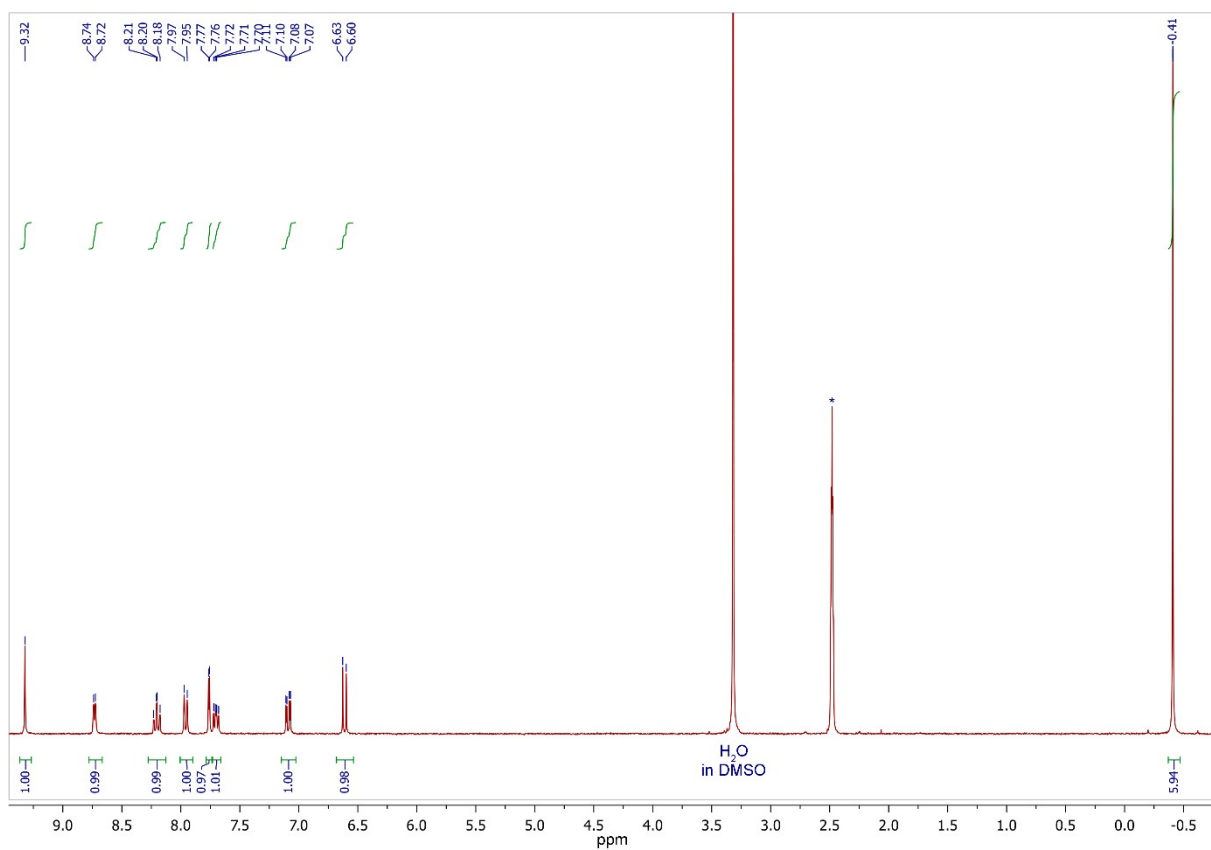

**Fig. S6.** <sup>1</sup>H NMR spectrum of **3** (\*from residual DMSO in DMSO-d<sub>6</sub>).



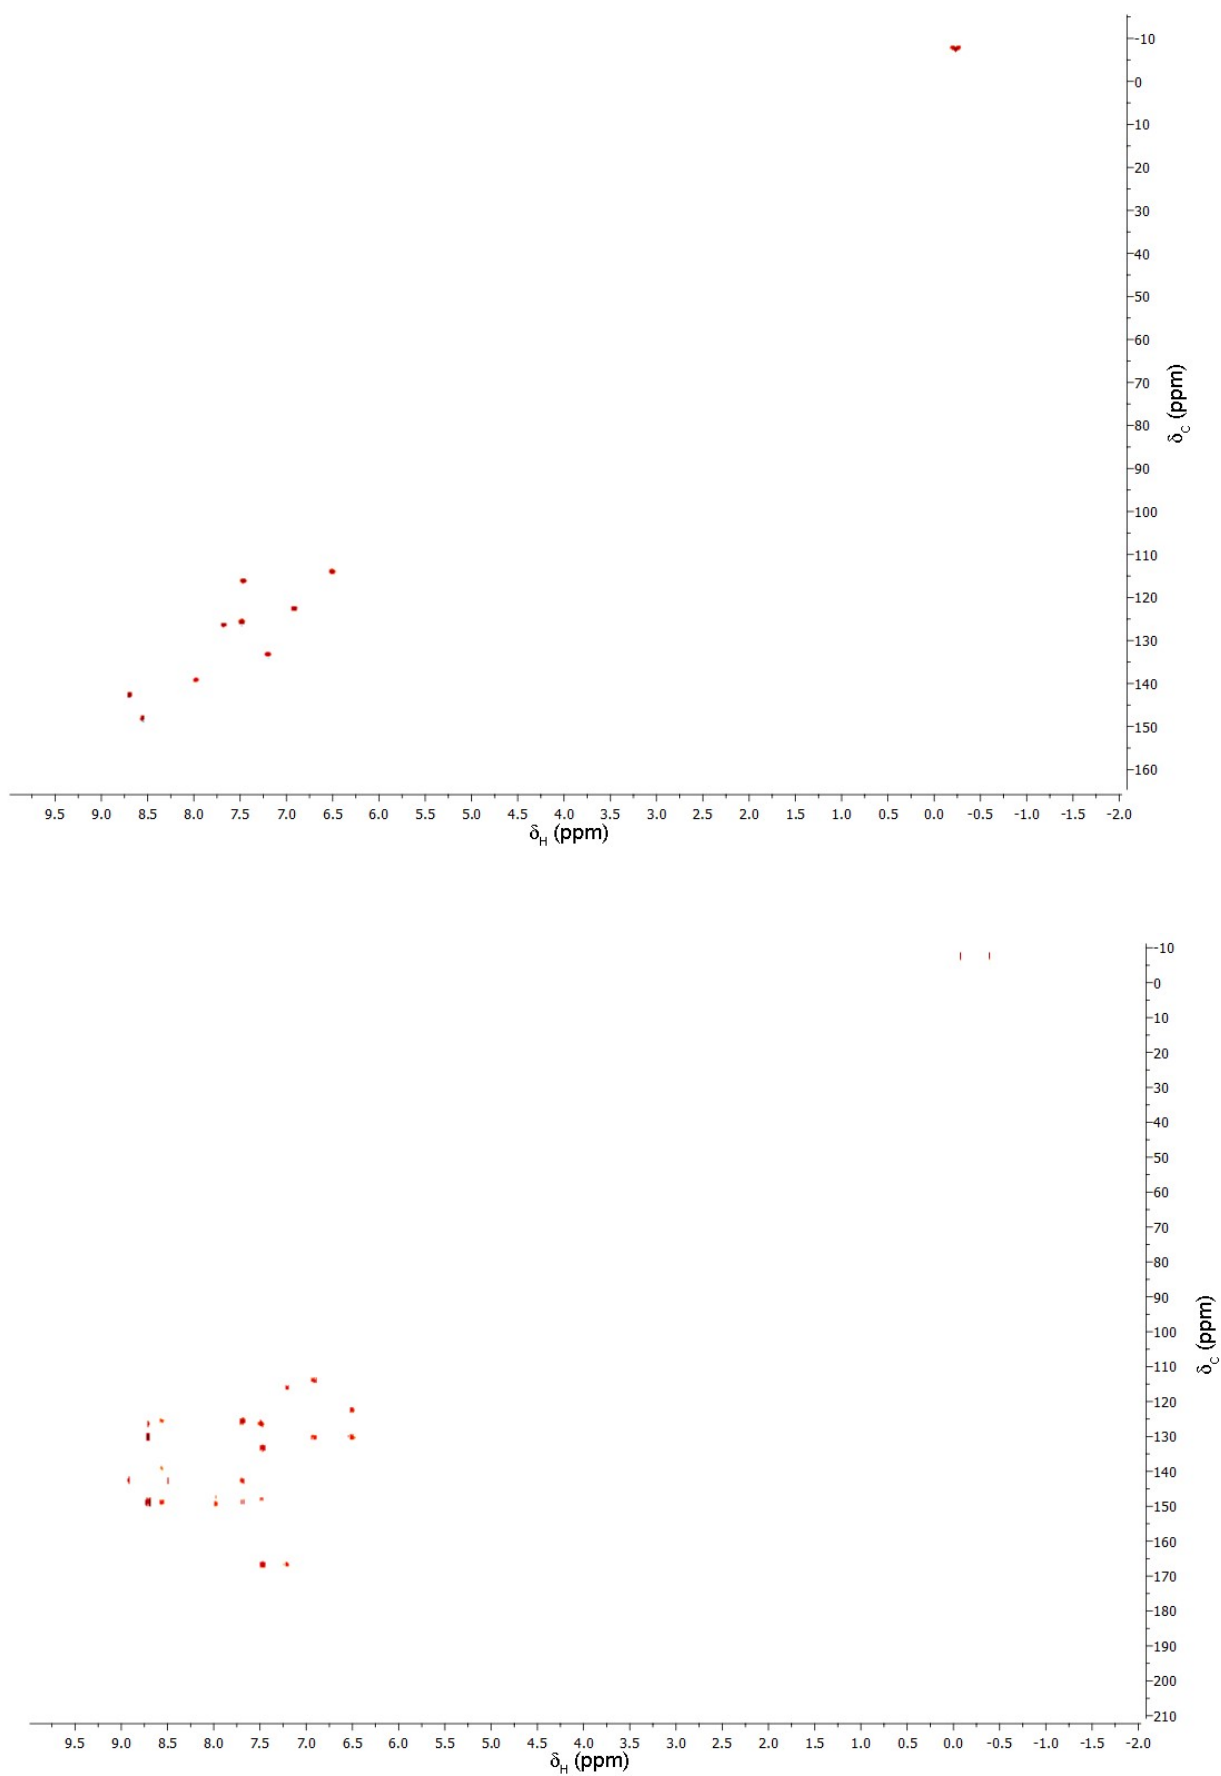

**Fig. S7.** HSQC (top) and HMBC (bottom) 2D-NMR spectra of **1**

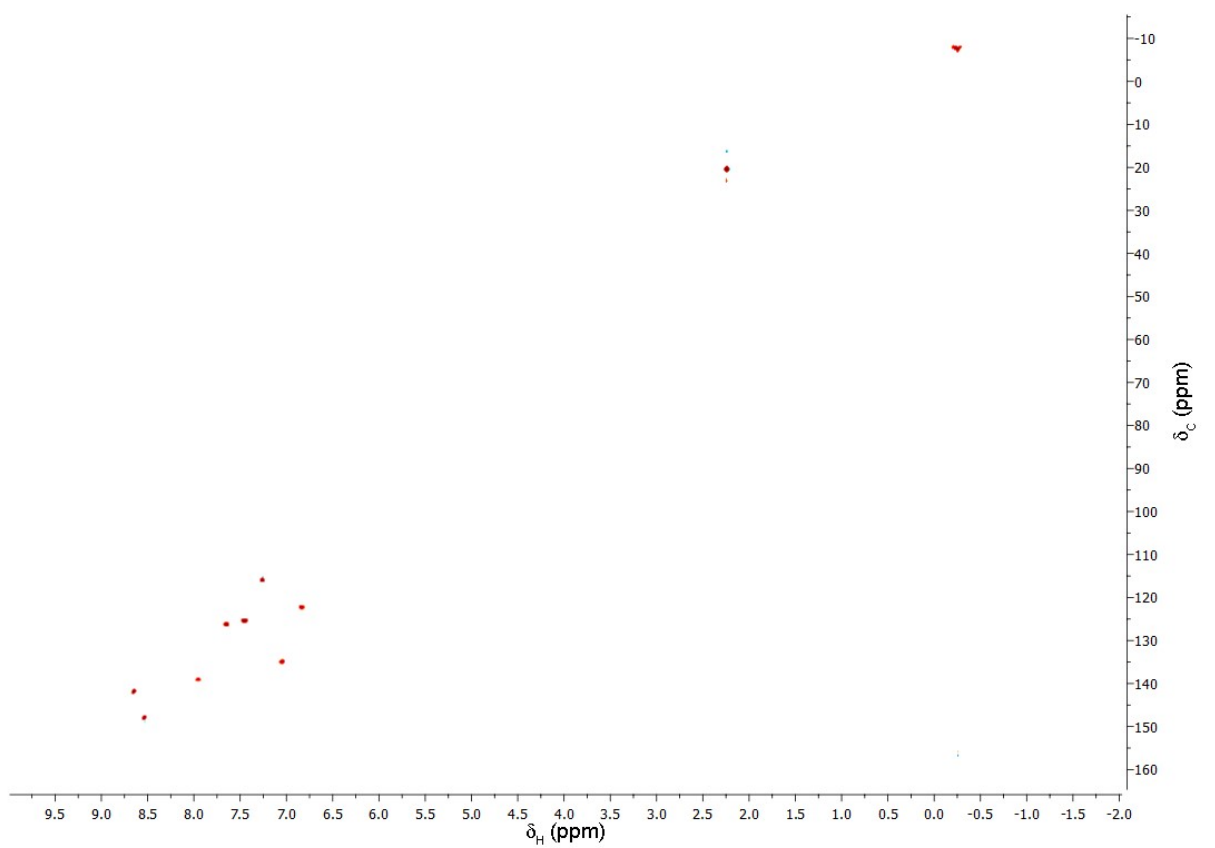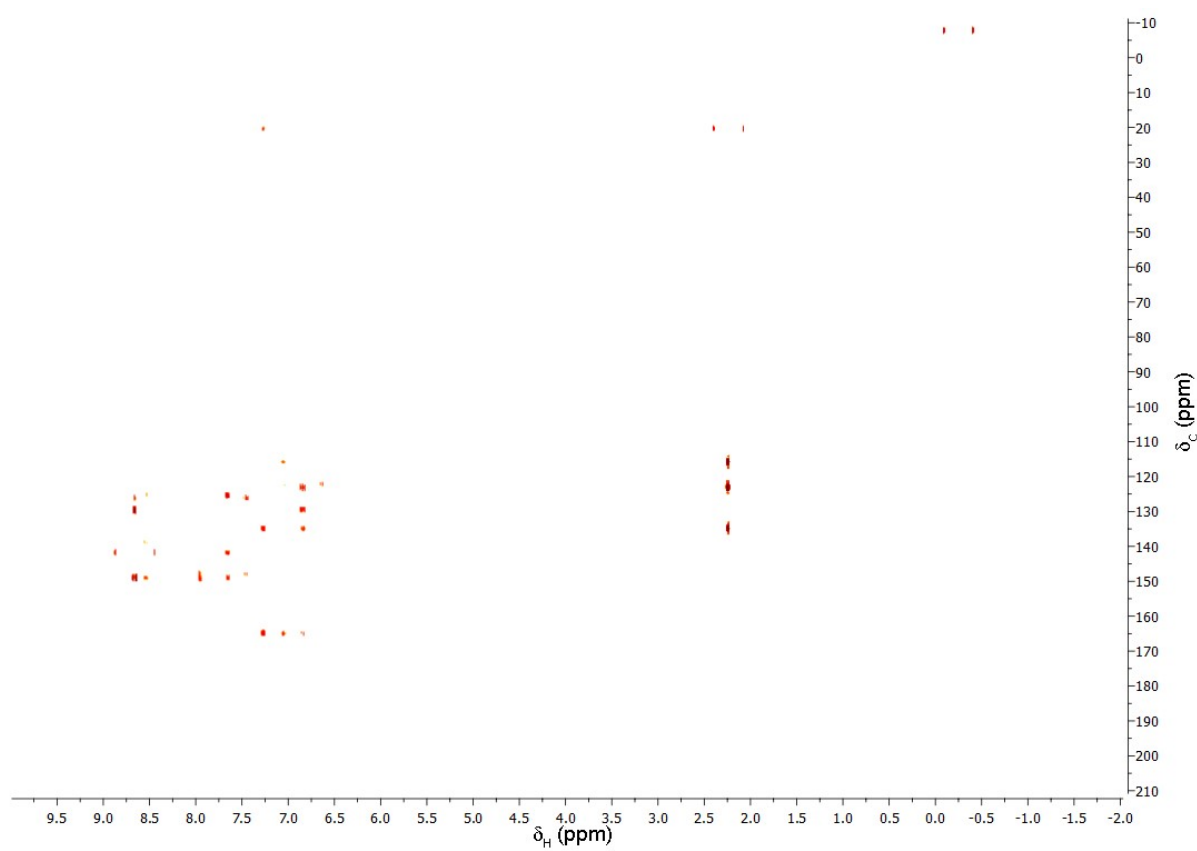

**Fig. S8.** HSQC (top) and HMBC (bottom) 2D-NMR spectra of **2**

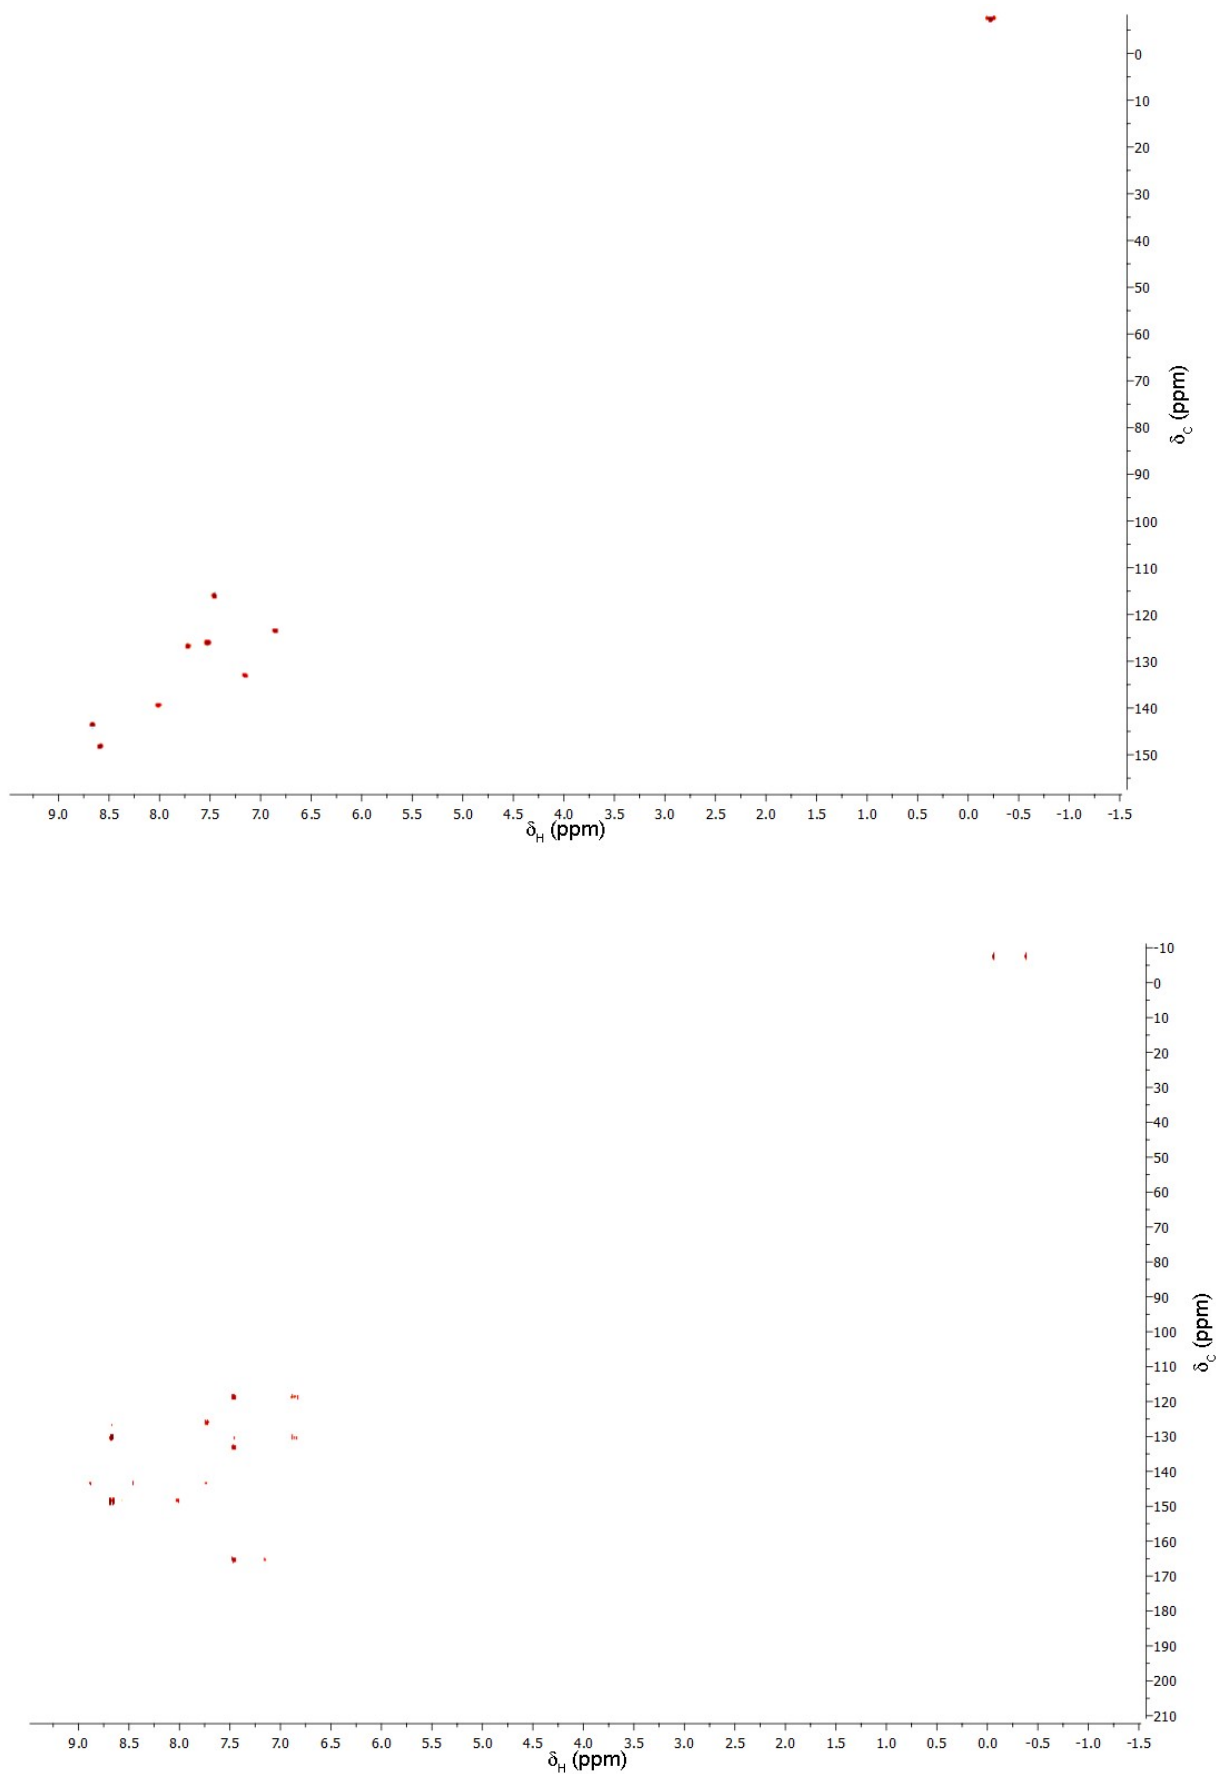

**Fig. S9.** HSQC (top) and HMBC (bottom) 2D-NMR spectra of **3**

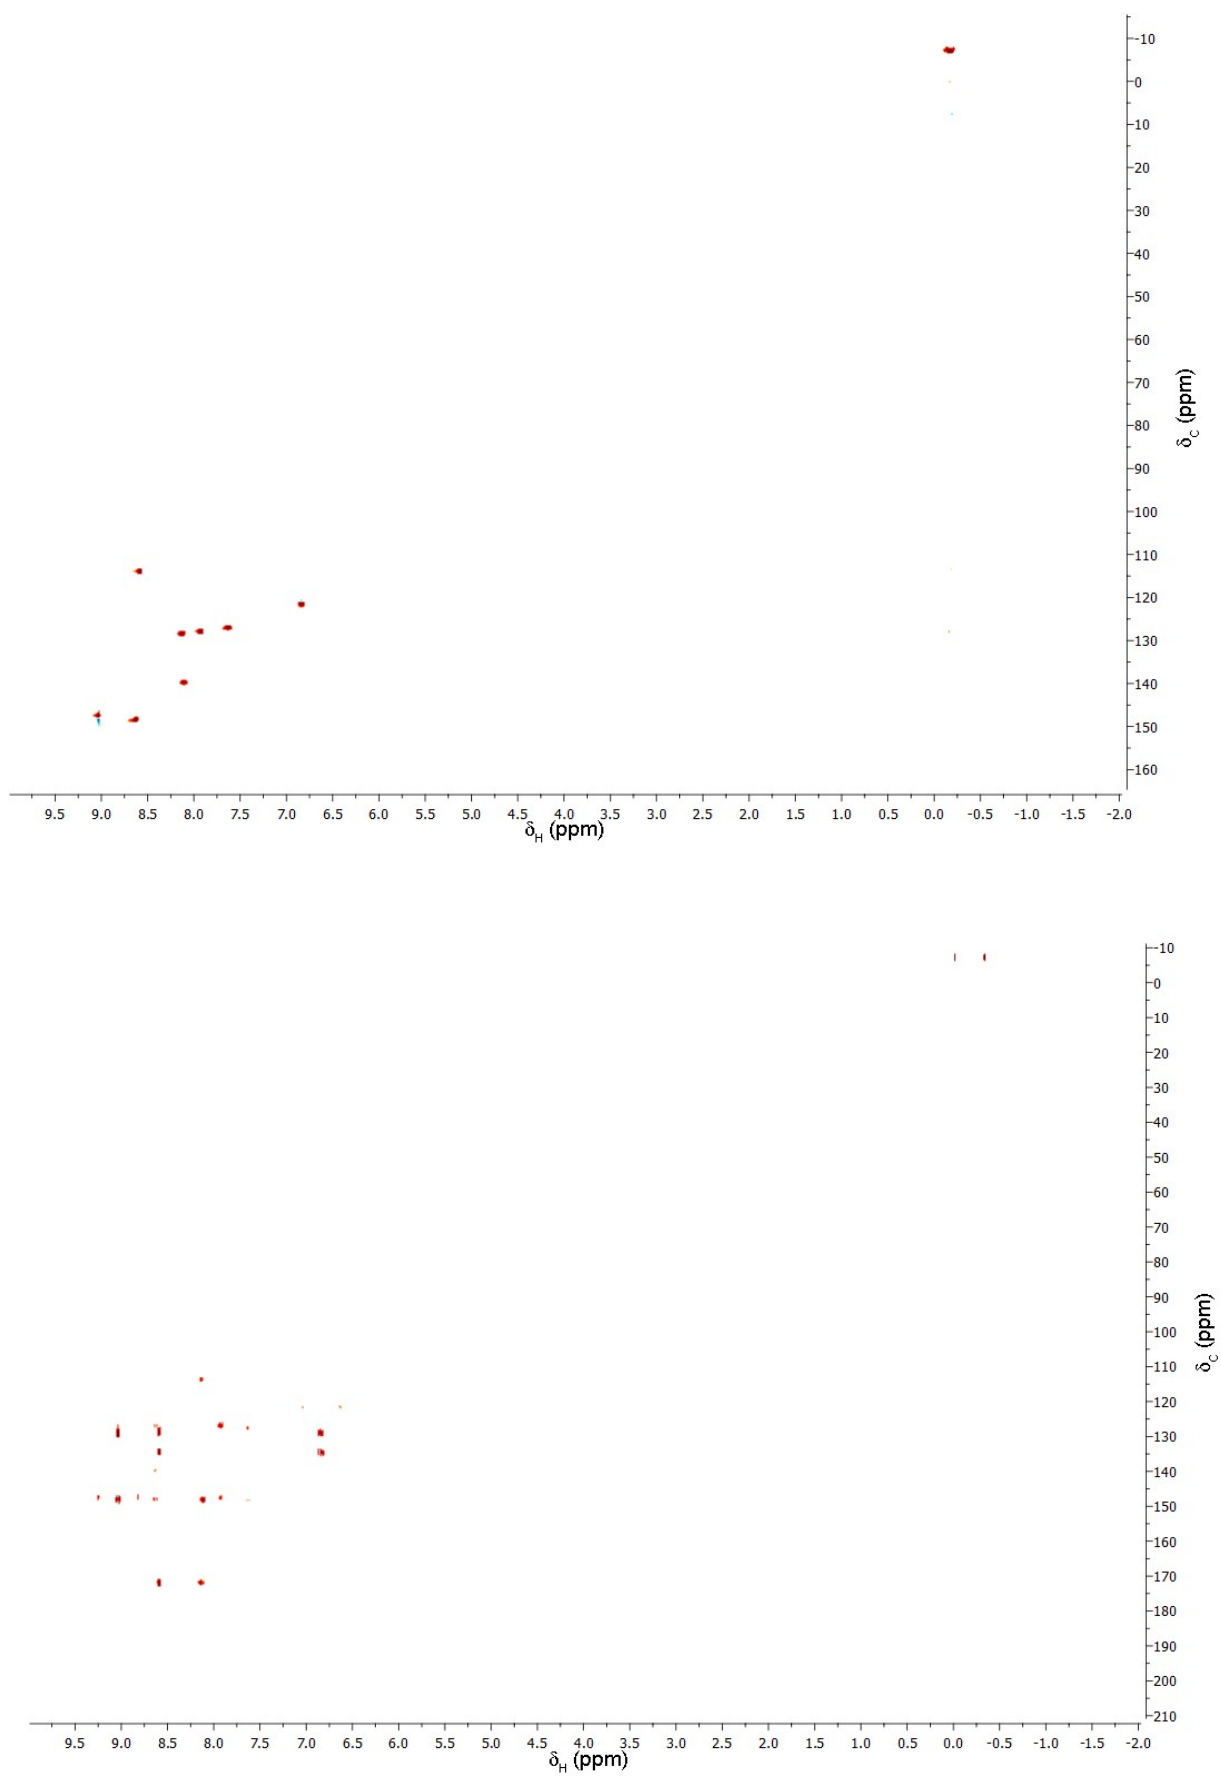

**Fig. S10.** HSQC (top) and HMBC (bottom) 2D-NMR spectra of **4**

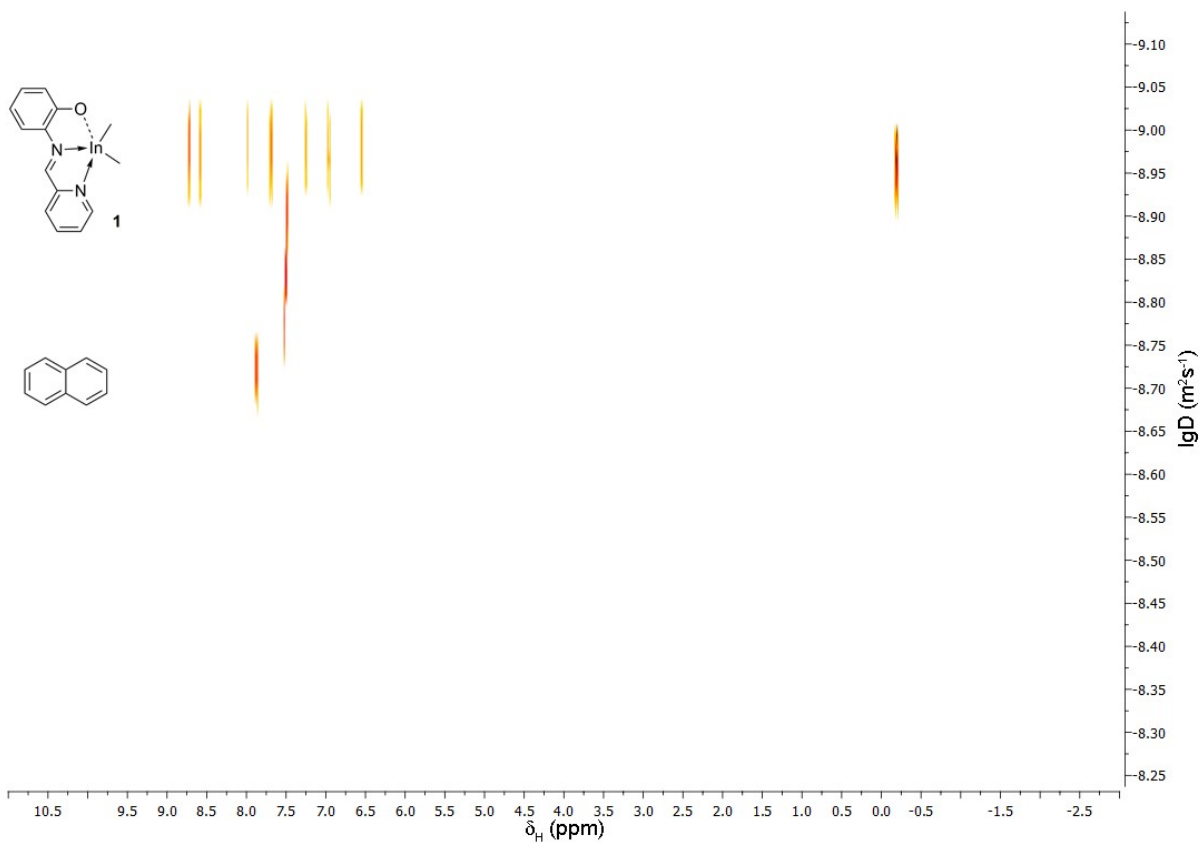

**Fig. S11.** DOSY spectrum of **1**.

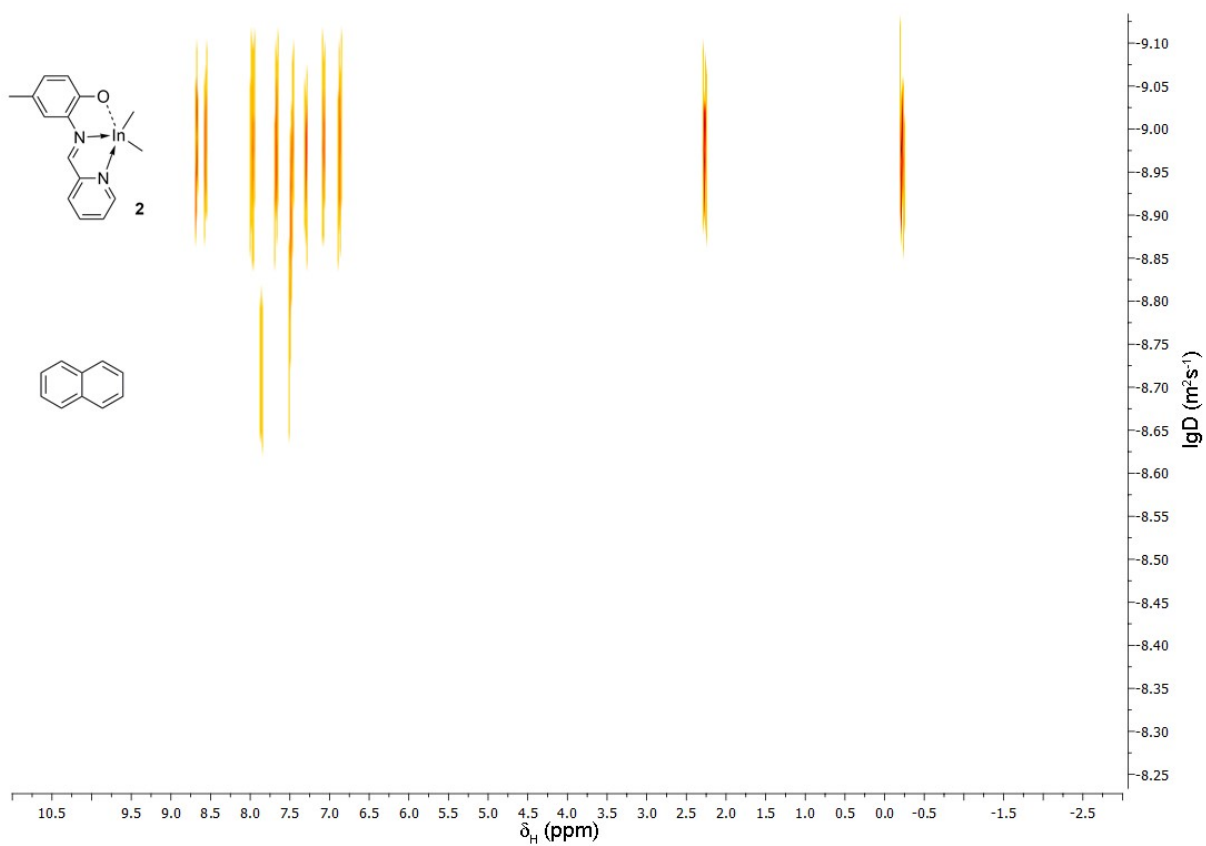

**Fig. S12.** DOSY spectrum of **2**.

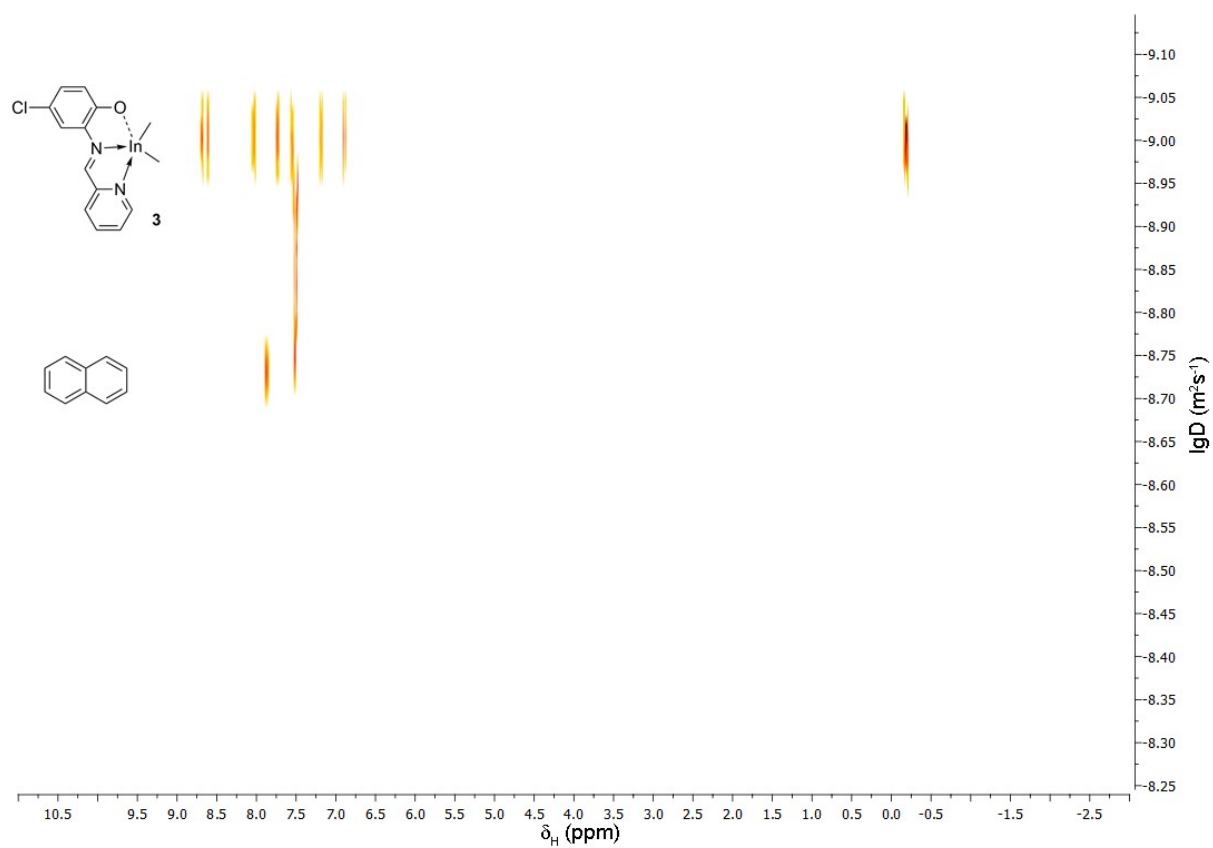

**Fig. S13.** DOSY spectrum of 3.

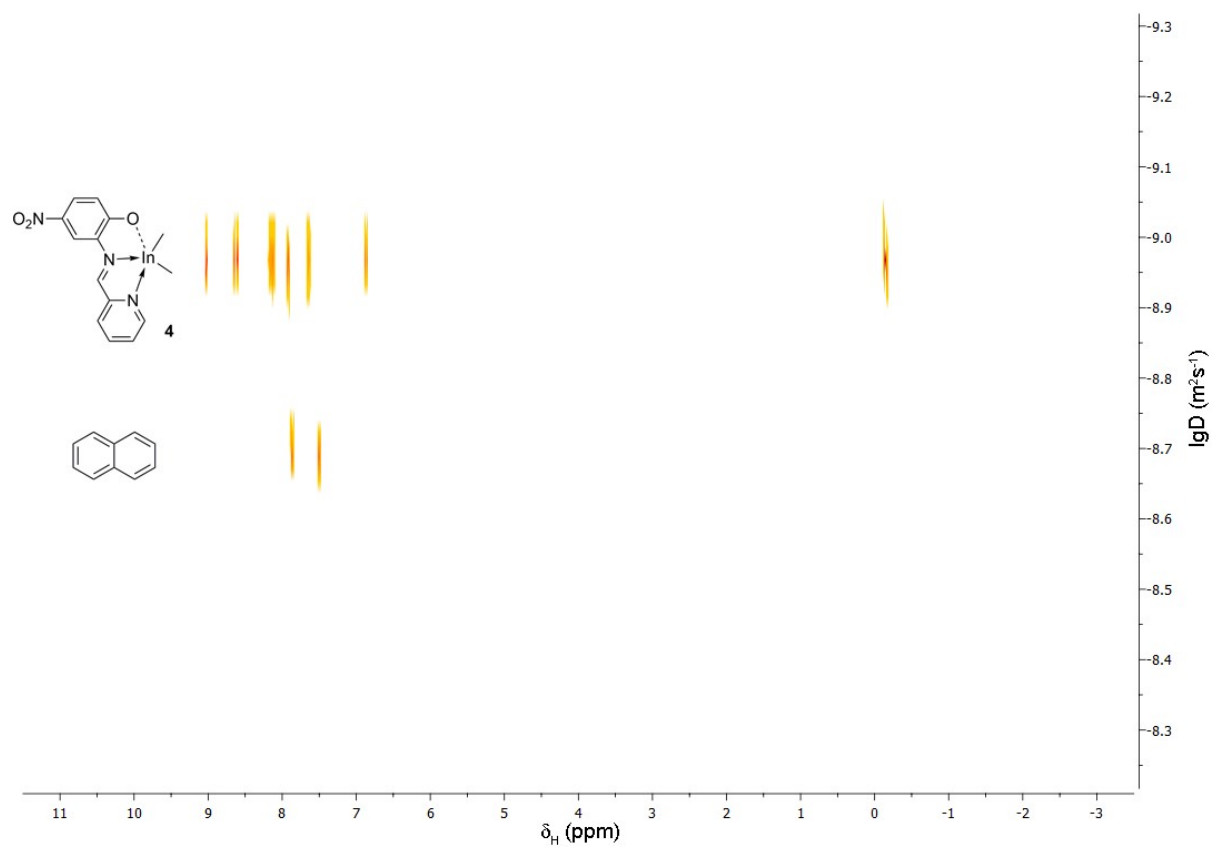

**Fig. S14.** DOSY spectrum of 4.

**Table S3.** Results of measurements of diffusion coefficient (D).

| Molecule                                                                           | $M_w$  | $\lg M_w$ | $-\lg D$ | ref. | Molecule                                                                           | $M_w$  | $\lg M_w$ | $-\lg D$ | ref. |
|------------------------------------------------------------------------------------|--------|-----------|----------|------|------------------------------------------------------------------------------------|--------|-----------|----------|------|
| 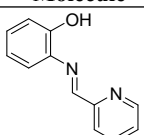  | 198.23 | 2.3       | 8.95     | [1]  |  | 212.25 | 2.33      | 8.99     | [1]  |
|   | 232.67 | 2.37      | 8.97     | [2]  |  | 532.82 | 2.73      | 9.12     | [3]  |
|   | 534.49 | 2.73      | 9.14     | [3]  |  | 729.37 | 2.86      | 9.23     | [4]  |
|   | 611.46 | 2.79      | 9.18     | [5]  |  | 735.6  | 2.87      | 9.18     | [5]  |
|  | 919.75 | 2.96      | 9.32     | [6]  |                                                                                    |        |           |          |      |

*This work*

| Molecule                                                                            | $M_w$  | $\lg M_w$ | $-\lg D$ | Molecule                                                                             | $M_w$  | $\lg M_w$ | $-\lg D$ |
|-------------------------------------------------------------------------------------|--------|-----------|----------|--------------------------------------------------------------------------------------|--------|-----------|----------|
| 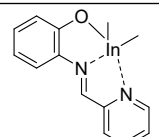 | 342.11 | 2.53      | 9.03     |  | 356.13 | 2.55      | 9.05     |
|  | 376.55 | 2.58      | 9.05     |  | 387.10 | 2.59      | 9.06     |
|  | 684.22 | 2.84      | 9.03     |  | 712.26 | 2.85      | 9.05     |
|  | 753.1  | 2.88      | 9.05     |  | 774.2  | 2.89      | 9.06     |

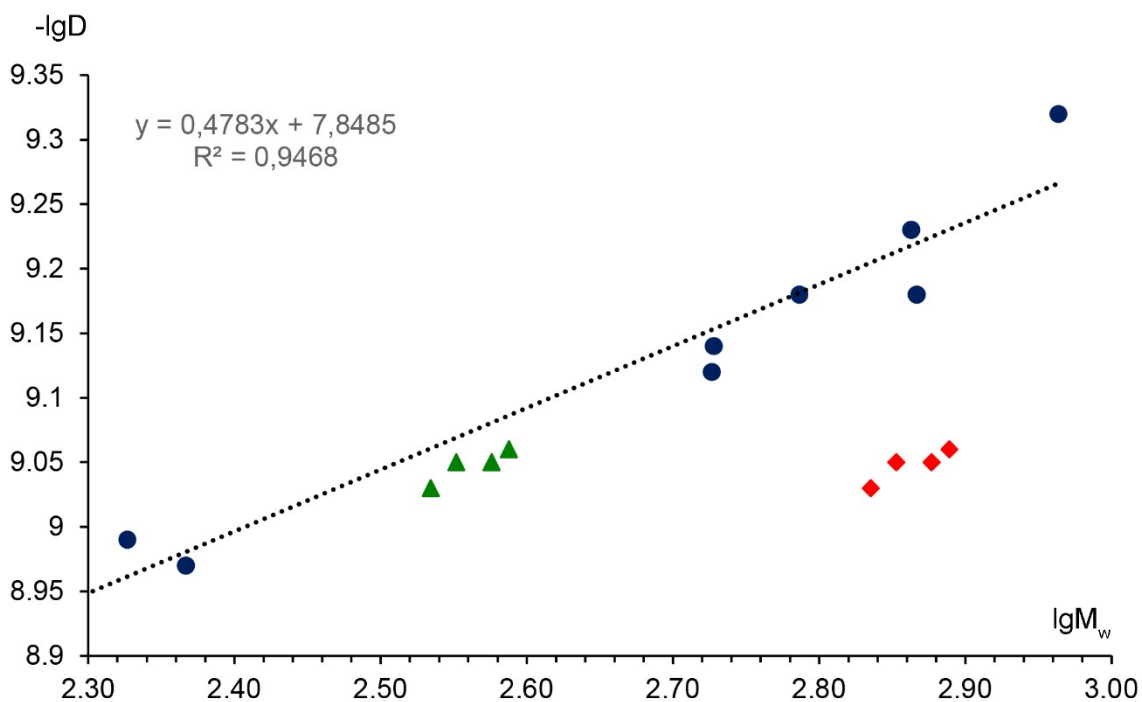

**Fig. S15.** Dependence of  $\log D$  vs  $\log M_w$  in  $CDCl_3$  (where  $D$  – diffusion coefficient,  $M_w$  – molecular weight). All compounds were normalized to  $\log D_{ref,fix}(Naphthalene) = -8.79$  [7]. Blue circles calculated for previously published compounds, green triangles – for monomeric species of **1-4**, red squares – for dimeric species of **1-4**. For data see Table S3.

1. Milani, N.C., et al., *A new class of copper(I) complexes with imine-containing chelators which show potent anticancer activity*. *Appl. Organomet. Chem.*, 2020. **34**(4): p. e5526.
2. Qiao, X., et al., *Study on potential antitumor mechanism of a novel Schiff Base copper(II) complex: Synthesis, crystal structure, DNA binding, cytotoxicity and apoptosis induction activity*. *J. Inorg. Biochem.*, 2011. **105**(5): p. 728-737.
3. Piskunov, A.V., et al., *Template Synthesis of Tin(IV) Complexes with Tridentate Iminopyridine Ligands*. *Russ. J. Coord. Chem.*, 2019. **45**(3): p. 188-199.
4. Piskunov, A.V., et al., *Template Assembling of the Pentadentate Redox-Active Ligand in the Coordination Sphere of Tin(IV)*. *Russ. J. Coord. Chem.*, 2018. **44**(2): p. 138-146.
5. Piskunov, A.V., et al., *Tin(iv) and lead(iv) complexes with a tetradentate redox-active ligand*. *Dalton Trans.*, 2012. **41**(36): p. 10970-10979.
6. Cherkasov, V.K., et al., *A New Octacoordinated Tin Complex with Tetradentate RedoxActive Ligands*. *Doklady Chemistry*, 2013. **448**: p. 61-65.
7. Neufeld, R. and D. Stalke, *Accurate molecular weight determination of small molecules via DOSY-NMR by using external calibration curves with normalized diffusion coefficients*. *Chem. Sci.*, 2015. **6**: p. 3354-3364.



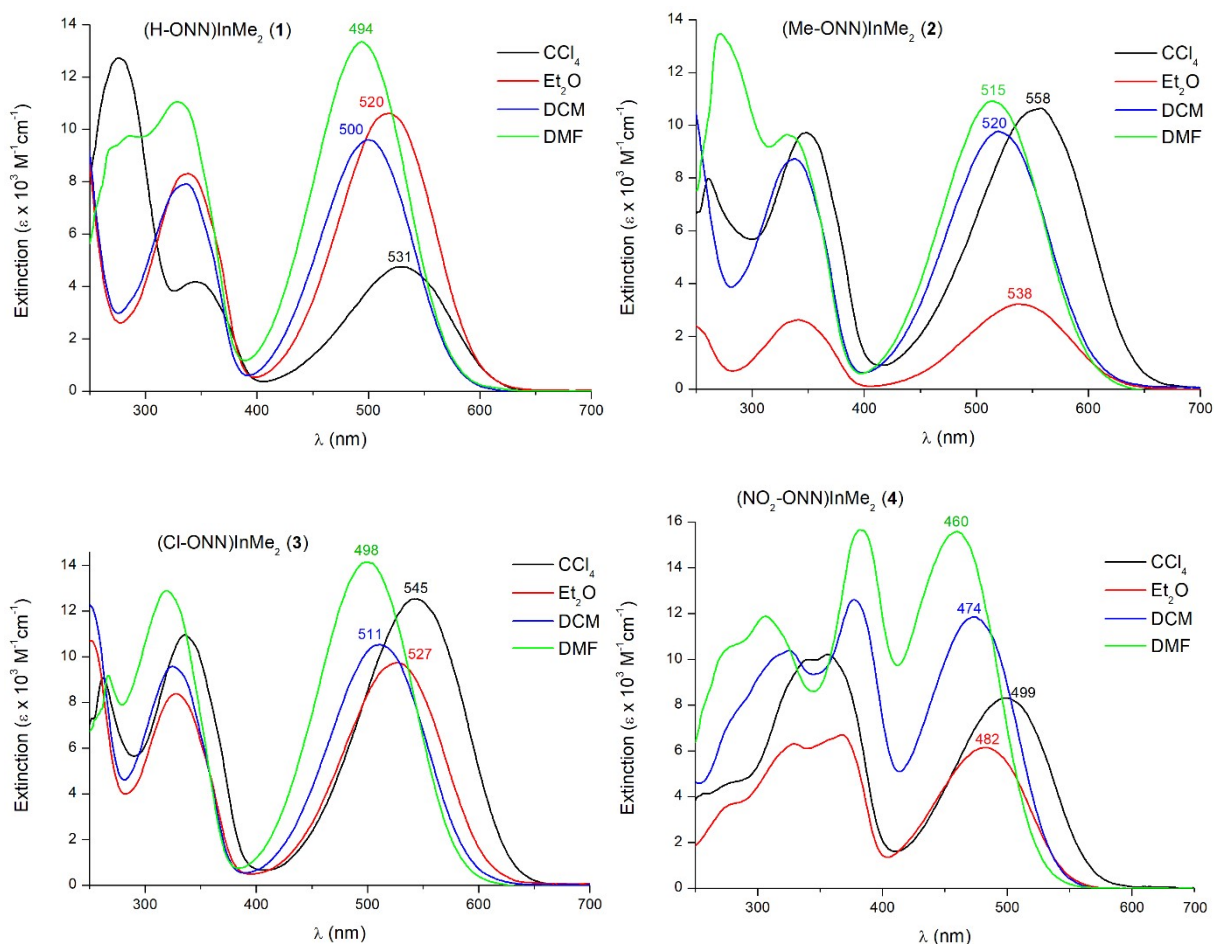

**Fig. S16.** UV-vis absorption spectra of **1-4** in various organic solvents at 293 K ( $C = 10^{-4}$  M).

**Table S4.** Electronic absorption spectral data of **1-4** in  $\text{CCl}_4$ ,  $\text{Et}_2\text{O}$ , DCM, DMF at 293 K.

| Complex  | Solvent               | $\lambda_{\text{max}}$ , nm ( $\epsilon \times 10^{-4} \text{ M}^{-1} \text{ cm}^{-1}$ ) |               |             |             |            |
|----------|-----------------------|------------------------------------------------------------------------------------------|---------------|-------------|-------------|------------|
| <b>1</b> | $\text{CCl}_4$        | 276 (1.27),                                                                              | 345 (0.42),   | 531 (0.47)  |             |            |
|          | $\text{Et}_2\text{O}$ | 238 (1.17),                                                                              | 339 (0.83),   | 520 (1.06)  |             |            |
|          | DCM                   | 239 (1.17),                                                                              | 336 (0.79),   | 500 (0.96)  |             |            |
|          | DMF                   | 274sh (0.94),                                                                            | 286sh (0.98), | 330 (1.10), | 494 (1.33)  |            |
| <b>2</b> | $\text{CCl}_4$        | 261 (0.80),                                                                              | 348 (0.97),   | 558 (1.06)  |             |            |
|          | $\text{Et}_2\text{O}$ | 233 (0.30),                                                                              | 259sh (0.20), | 341 (0.26), | 538 (0.32)  |            |
|          | DCM                   | 235 (1.26),                                                                              | 337 (0.87),   | 520 (0.98)  |             |            |
|          | DMF                   | 272 (1.35),                                                                              | 331 (0.96),   | 515 (1.09)  |             |            |
| <b>3</b> | $\text{CCl}_4$        | 262 (0.91),                                                                              | 336 (1.10),   | 545 (1.25)  |             |            |
|          | $\text{Et}_2\text{O}$ | 232 (1.19),                                                                              | 251sh (1.07), | 328 (0.84), | 527 (0.97)  |            |
|          | DCM                   | 237 (1.25),                                                                              | 251sh (1.22), | 324 (0.96), | 511 (1.05)  |            |
|          | DMF                   | 267 (0.92),                                                                              | 320 (1.29),   | 498 (1.41)  |             |            |
| <b>4</b> | $\text{CCl}_4$        | 341sh (1.00),                                                                            | 356 (1.02),   | 499 (0.83)  |             |            |
|          | $\text{Et}_2\text{O}$ | 224 (0.50),                                                                              | 276sh (0.36), | 329 (0.63), | 368 (0.67), | 482 (0.61) |
|          | DCM                   | 230 (0.76),                                                                              | 325 (1.04),   | 377 (1.26), | 474 (1.18)  |            |
|          | DMF                   | 277sh (1.05),                                                                            | 306 (1.19),   | 382 (1.57), | 460 (1.56)  |            |

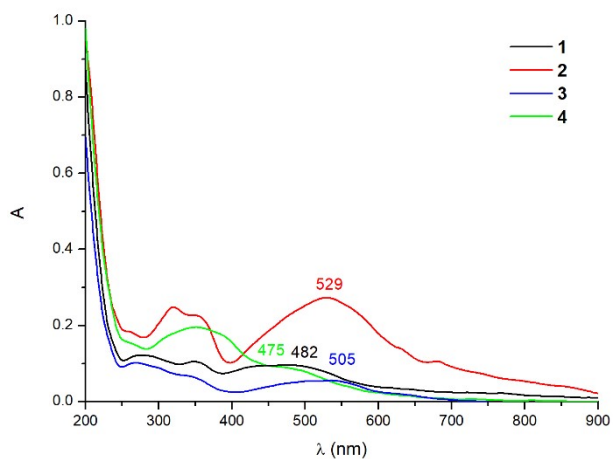

**Fig. S17.** UV-vis absorption spectra of **1-4** recorded in Nujol at 293 K.

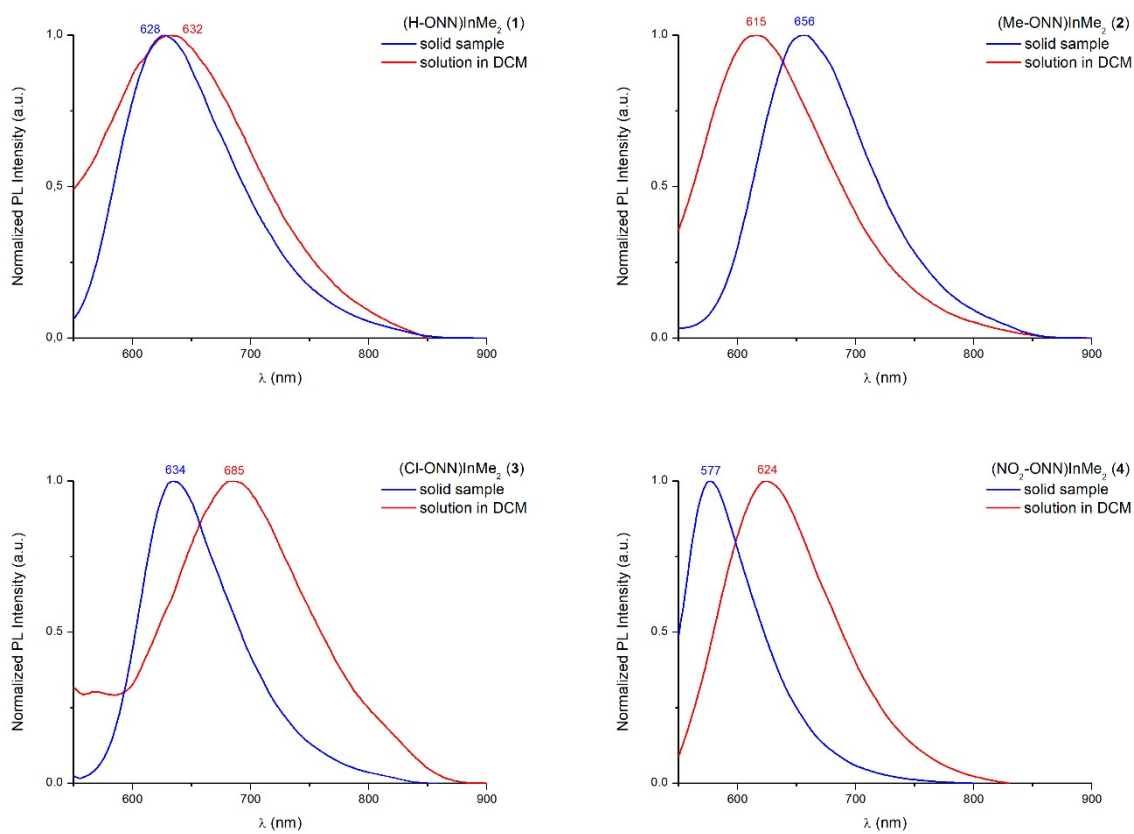

**Fig. S18.** PL spectra of **1-4** recorded in solid state and in DCM solution ( $C = 10^{-5}$  M) at 293 K.

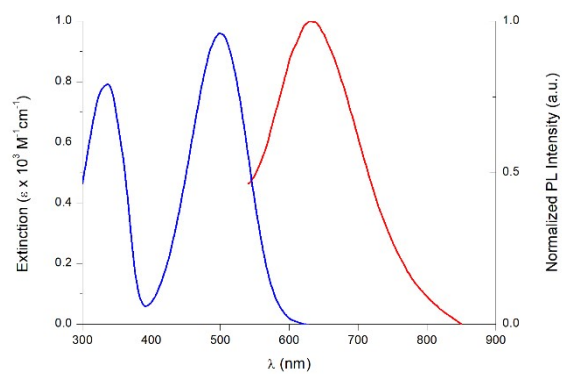

**Fig. S19.** UV-PL spectra of **1** in DCM at 293 K.

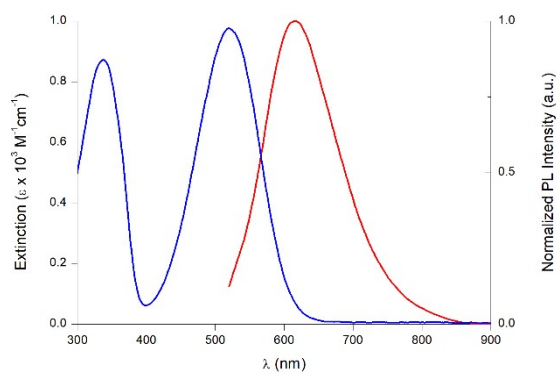

**Fig. S20.** UV-PL spectra of **2** in DCM at 293 K.

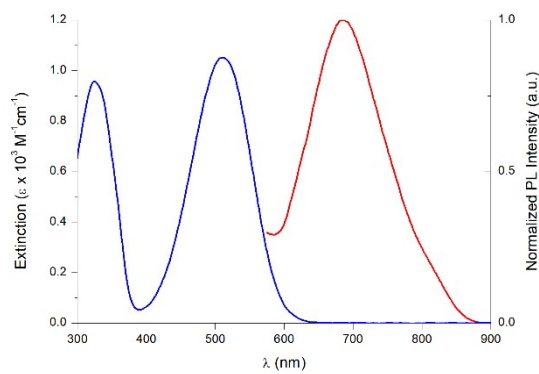

**Fig. S21.** UV-PL spectra of **3** in DCM at 293 K.

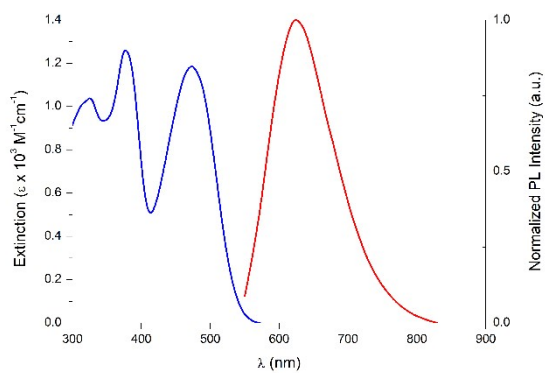

**Fig. S22.** UV-PL spectra of **4** in DCM at 293 K.

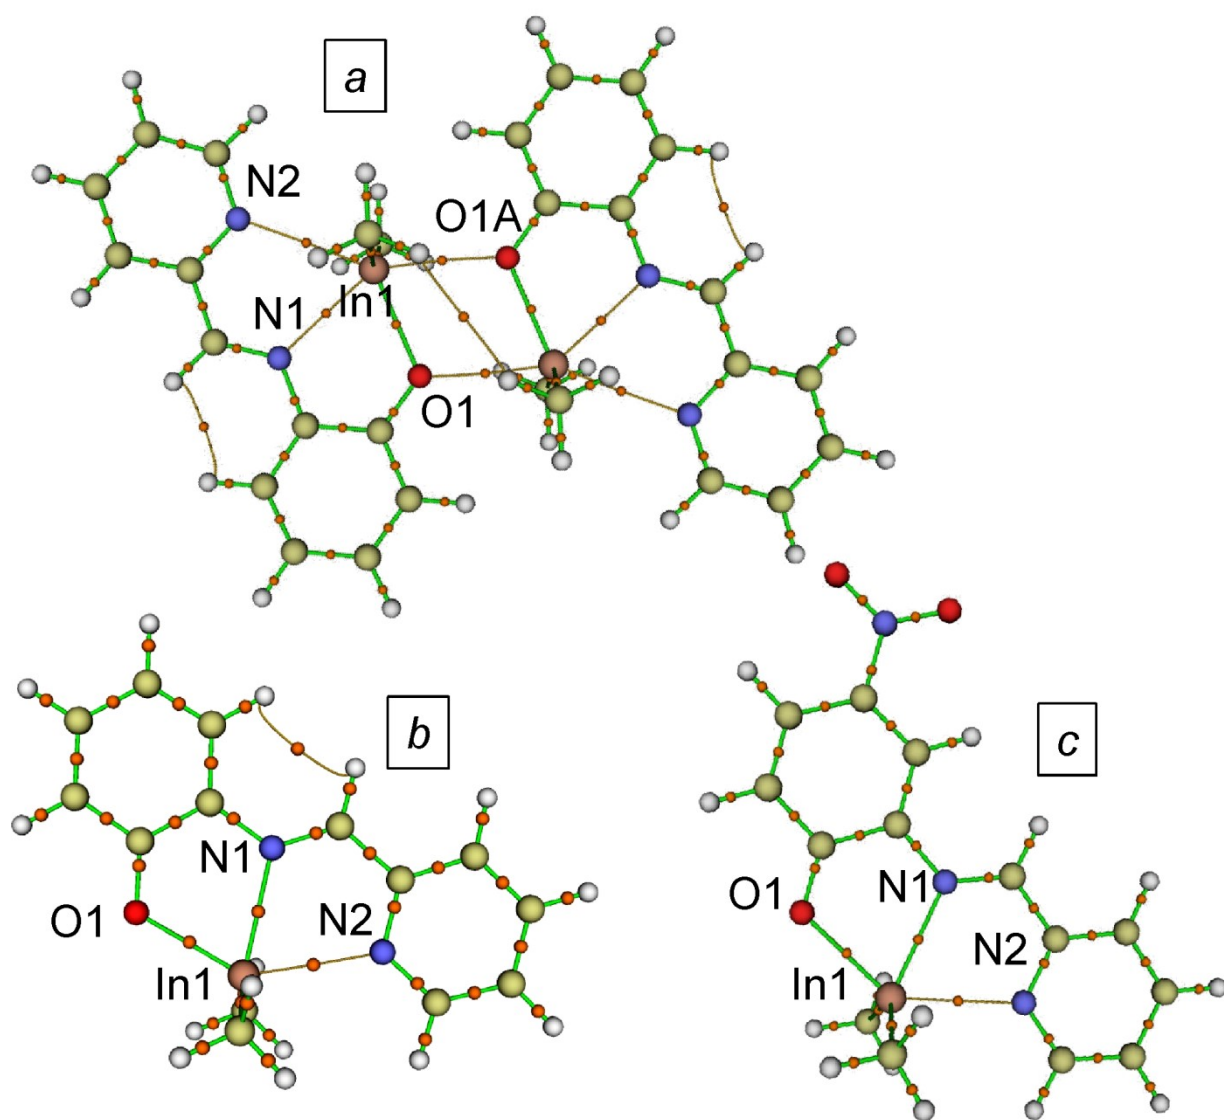

**Fig. S23.** Molecular graphs of the DFT-optimized **1** dimer (a) and monomers **1** (b) and **4** (c). The small orange circles correspond to the (3,-1) bonding critical points.

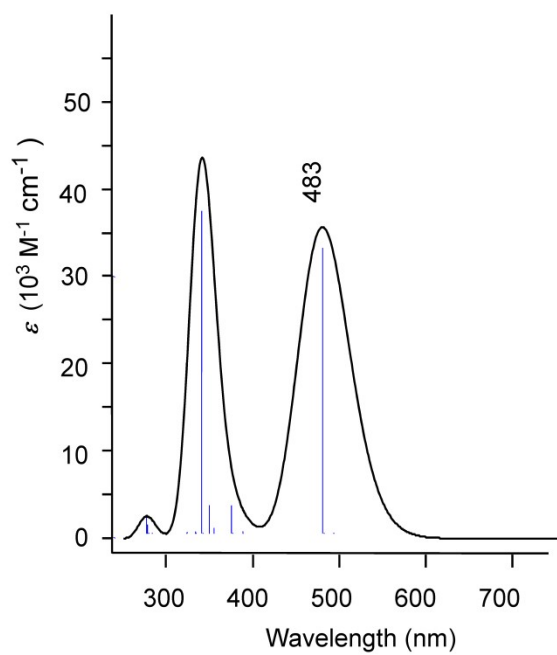

**Fig. S24.** Calculated absorption spectrum of the **1** dimer. The long-wavelength peak maximum (nm) is indicated.

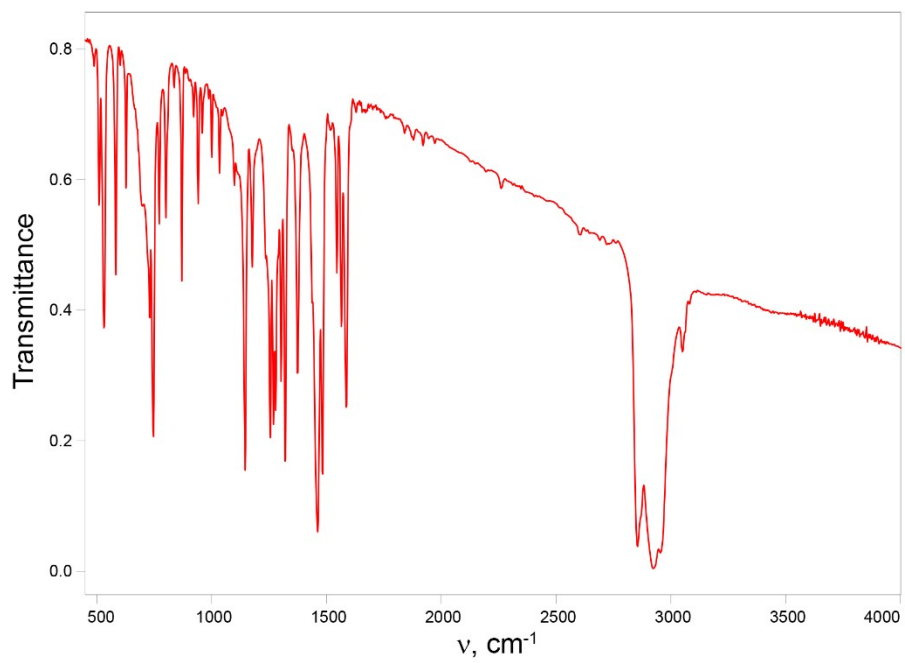

**Fig. S25.** IR spectrum of **1**.

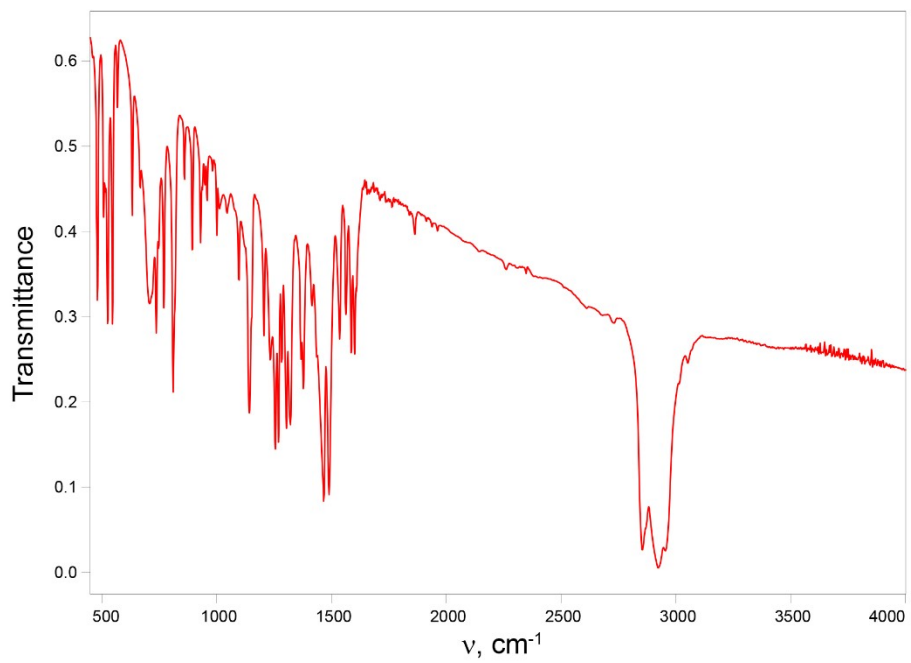

**Fig. S26.** IR spectrum of **2**.

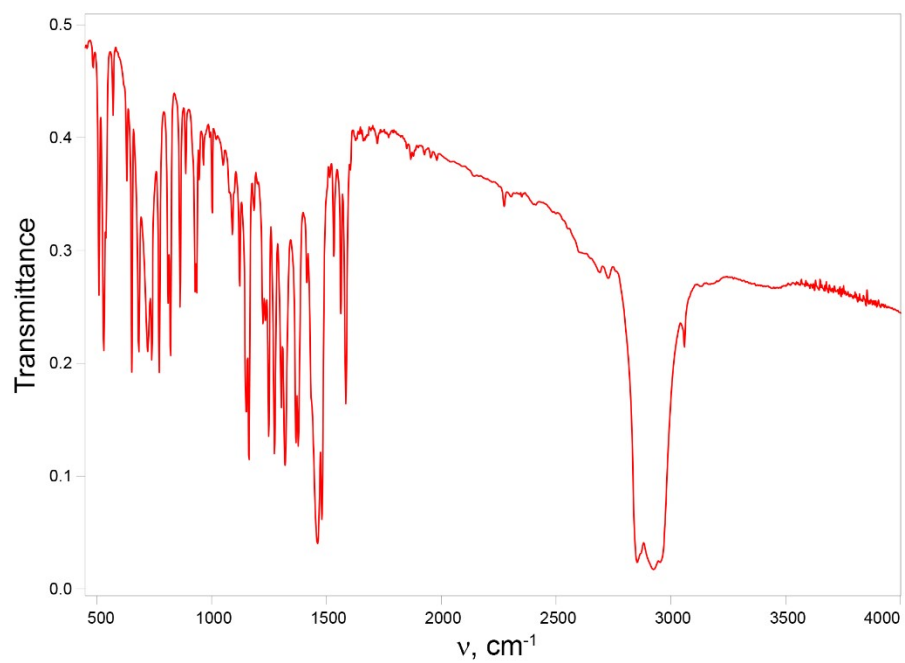

**Fig. S27.** IR spectrum of **3**.

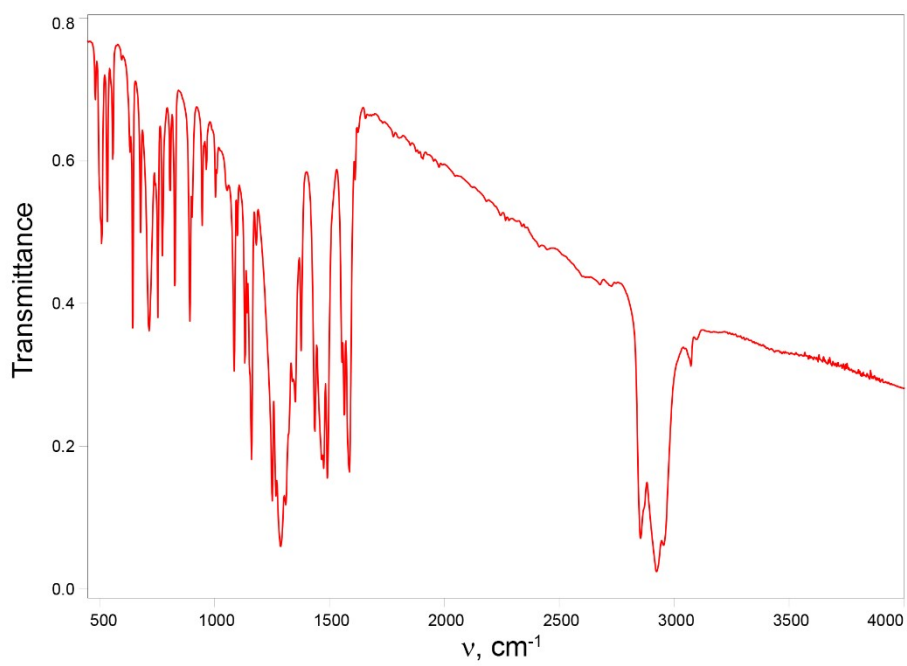

**Fig. S28.** IR spectrum of **4**.

Atomic coordinates in the optimized structures of dimer **1** and **1, 4** monomers.

66

1 dimer, S0, E = -1835.54984445 a.u.

|    |           |           |           |
|----|-----------|-----------|-----------|
| In | 1.921100  | 0.562900  | -0.000200 |
| O  | 0.657400  | -1.278700 | 0.000500  |
| N  | 3.375500  | -1.437500 | 0.000000  |
| N  | 4.690200  | 1.030700  | -0.000200 |
| C  | 2.006000  | 1.156800  | 2.079400  |
| H  | 2.723900  | 0.532500  | 2.609300  |
| H  | 1.020800  | 1.033300  | 2.523700  |
| H  | 2.309700  | 2.198400  | 2.178300  |
| C  | 2.006000  | 1.156100  | -2.079900 |
| H  | 1.020900  | 1.032300  | -2.524400 |
| H  | 2.724100  | 0.531900  | -2.609700 |
| H  | 2.309300  | 2.197700  | -2.178900 |
| C  | 1.214000  | -2.451500 | 0.000200  |
| C  | 0.429000  | -3.633400 | 0.000200  |
| H  | -0.646600 | -3.525900 | 0.000300  |
| C  | 1.006600  | -4.881200 | -0.000000 |
| H  | 0.374900  | -5.760800 | -0.000100 |
| C  | 2.402700  | -5.029900 | -0.000300 |
| H  | 2.848800  | -6.014700 | -0.000500 |
| C  | 3.196700  | -3.905800 | -0.000200 |
| H  | 4.271600  | -4.027400 | -0.000500 |
| C  | 2.638100  | -2.614700 | 0.000000  |
| C  | 4.657700  | -1.378700 | 0.000300  |
| H  | 5.275700  | -2.275400 | 0.000600  |
| C  | 5.388500  | -0.116000 | 0.000200  |
| C  | 6.788800  | -0.122400 | 0.000400  |
| H  | 7.323700  | -1.062700 | 0.000700  |
| C  | 7.469700  | 1.083900  | 0.000300  |
| H  | 8.551500  | 1.102500  | 0.000500  |
| C  | 6.740400  | 2.265900  | -0.000100 |
| H  | 7.228000  | 3.230400  | -0.000200 |
| C  | 5.351100  | 2.180900  | -0.000300 |
| H  | 4.746100  | 3.080700  | -0.000600 |
| In | -1.921100 | -0.562900 | 0.000200  |
| O  | -0.657400 | 1.278700  | -0.000500 |
| N  | -3.375500 | 1.437500  | -0.000000 |
| N  | -4.690200 | -1.030700 | 0.000200  |
| C  | -2.006000 | -1.156800 | -2.079400 |
| H  | -2.723900 | -0.532500 | -2.609300 |
| H  | -1.020900 | -1.033300 | -2.523700 |
| H  | -2.309700 | -2.198400 | -2.178300 |
| C  | -2.006000 | -1.156100 | 2.079900  |
| H  | -1.020900 | -1.032300 | 2.524400  |
| H  | -2.724100 | -0.531900 | 2.609700  |
| H  | -2.309300 | -2.197700 | 2.178900  |



|   |           |           |           |
|---|-----------|-----------|-----------|
| C | -1.214000 | 2.451500  | -0.000200 |
| C | -0.429000 | 3.633400  | -0.000200 |
| H | 0.646600  | 3.525900  | -0.000300 |
| C | -1.006600 | 4.881200  | 0.000100  |
| H | -0.374900 | 5.760800  | 0.000100  |
| C | -2.402700 | 5.029900  | 0.000300  |
| H | -2.848800 | 6.014700  | 0.000500  |
| C | -3.196800 | 3.905800  | 0.000300  |
| H | -4.271600 | 4.027400  | 0.000500  |
| C | -2.638100 | 2.614800  | -0.000000 |
| C | -4.657700 | 1.378700  | -0.000300 |
| H | -5.275700 | 2.275400  | -0.000600 |
| C | -5.388500 | 0.116000  | -0.000100 |
| C | -6.788800 | 0.122300  | -0.000400 |
| H | -7.323700 | 1.062700  | -0.000700 |
| C | -7.469700 | -1.083900 | -0.000300 |
| H | -8.551500 | -1.102500 | -0.000500 |
| C | -6.740400 | -2.265900 | 0.000100  |
| H | -7.227900 | -3.230400 | 0.000200  |
| C | -5.351100 | -2.180900 | 0.000300  |
| H | -4.746100 | -3.080700 | 0.000500  |

66

1 dimer (+D3), S0, E = -1835.62638846 a.u.

|    |           |           |           |
|----|-----------|-----------|-----------|
| In | -1.866300 | 0.561600  | 0.000200  |
| O  | -0.602600 | -1.278200 | 0.000700  |
| N  | -3.311300 | -1.467500 | -0.000100 |
| N  | -4.609500 | 0.995000  | -0.000800 |
| C  | -1.963200 | 1.122000  | -2.083000 |
| H  | -2.717000 | 0.522400  | -2.591700 |
| H  | -0.989500 | 0.946000  | -2.536600 |
| H  | -2.218700 | 2.175400  | -2.196400 |
| C  | -1.964400 | 1.122200  | 2.083200  |
| H  | -0.991000 | 0.946200  | 2.537300  |
| H  | -2.718500 | 0.522700  | 2.591500  |
| H  | -2.219800 | 2.175600  | 2.196500  |
| C  | -1.142900 | -2.459300 | 0.001000  |
| C  | -0.342000 | -3.628600 | 0.001900  |
| H  | 0.731900  | -3.506800 | 0.002300  |
| C  | -0.904600 | -4.883900 | 0.002200  |
| H  | -0.262200 | -5.755700 | 0.002800  |
| C  | -2.298600 | -5.049500 | 0.001700  |
| H  | -2.732200 | -6.039800 | 0.002000  |
| C  | -3.107400 | -3.935300 | 0.000900  |
| H  | -4.180800 | -4.069100 | 0.000700  |
| C  | -2.564400 | -2.638000 | 0.000600  |
| C  | -4.593000 | -1.412300 | -0.000900 |
| H  | -5.212700 | -2.308400 | -0.001200 |
| C  | -5.318000 | -0.145500 | -0.001300 |

|    |           |           |           |
|----|-----------|-----------|-----------|
| C  | -6.718100 | -0.138200 | -0.002300 |
| H  | -7.263300 | -1.072600 | -0.002700 |
| C  | -7.386300 | 1.075900  | -0.002700 |
| H  | -8.467700 | 1.105600  | -0.003400 |
| C  | -6.645400 | 2.251100  | -0.002100 |
| H  | -7.123800 | 3.220200  | -0.002400 |
| C  | -5.256600 | 2.152100  | -0.001200 |
| H  | -4.639100 | 3.043300  | -0.000700 |
| In | 1.866300  | -0.561600 | 0.000200  |
| O  | 0.602600  | 1.278200  | 0.000800  |
| N  | 3.311300  | 1.467500  | 0.000000  |
| N  | 4.609500  | -0.995000 | -0.000900 |
| C  | 1.964300  | -1.122300 | 2.083200  |
| H  | 2.718400  | -0.522800 | 2.591600  |
| H  | 0.990900  | -0.946300 | 2.537300  |
| H  | 2.219800  | -2.175700 | 2.196400  |
| C  | 1.963200  | -1.121900 | -2.083000 |
| H  | 0.989600  | -0.946000 | -2.536600 |
| H  | 2.717000  | -0.522300 | -2.591600 |
| H  | 2.218800  | -2.175300 | -2.196500 |
| C  | 1.142900  | 2.459300  | 0.001200  |
| C  | 0.342000  | 3.628600  | 0.002100  |
| H  | -0.731900 | 3.506800  | 0.002500  |
| C  | 0.904600  | 4.883900  | 0.002500  |
| H  | 0.262200  | 5.755700  | 0.003200  |
| C  | 2.298600  | 5.049500  | 0.002000  |
| H  | 2.732100  | 6.039900  | 0.002400  |
| C  | 3.107400  | 3.935300  | 0.001200  |
| H  | 4.180800  | 4.069100  | 0.001000  |
| C  | 2.564400  | 2.638000  | 0.000800  |
| C  | 4.593000  | 1.412300  | -0.000700 |
| H  | 5.212800  | 2.308400  | -0.001000 |
| C  | 5.318000  | 0.145500  | -0.001300 |
| C  | 6.718100  | 0.138200  | -0.002200 |
| H  | 7.263300  | 1.072600  | -0.002500 |
| C  | 7.386300  | -1.075900 | -0.002700 |
| H  | 8.467700  | -1.105600 | -0.003400 |
| C  | 6.645400  | -2.251100 | -0.002300 |
| H  | 7.123800  | -3.220200 | -0.002600 |
| C  | 5.256500  | -2.152100 | -0.001400 |
| H  | 4.639100  | -3.043300 | -0.001000 |

33

1 monomer, S0, E = -917.784427637 a.u.

|    |           |           |           |
|----|-----------|-----------|-----------|
| In | 0.211100  | -1.371700 | -0.000300 |
| O  | -2.031400 | -1.357900 | 0.001100  |
| N  | -0.497400 | 0.877700  | 0.000200  |
| N  | 2.167600  | 0.244700  | 0.000200  |
| C  | 0.590600  | -2.077300 | -2.021900 |

|   |           |           |           |
|---|-----------|-----------|-----------|
| H | 0.369200  | -1.281300 | -2.732300 |
| H | -0.046800 | -2.932800 | -2.242300 |
| H | 1.632600  | -2.373100 | -2.137000 |
| C | 0.592500  | -2.080400 | 2.019900  |
| H | -0.045100 | -2.935800 | 2.239700  |
| H | 0.372400  | -1.285300 | 2.731700  |
| H | 1.634500  | -2.377000 | 2.133300  |
| C | -2.618600 | -0.205300 | 0.000700  |
| C | -4.035700 | -0.101500 | 0.000800  |
| H | -4.606100 | -1.021200 | 0.001100  |
| C | -4.665500 | 1.122500  | 0.000300  |
| H | -5.747600 | 1.165000  | 0.000400  |
| C | -3.925800 | 2.318400  | -0.000200 |
| H | -4.431500 | 3.273900  | -0.000700 |
| C | -2.548900 | 2.260200  | -0.000300 |
| H | -1.982900 | 3.182000  | -0.000800 |
| C | -1.877600 | 1.025200  | 0.000200  |
| C | 0.367500  | 1.827900  | 0.000400  |
| H | 0.082500  | 2.876400  | 0.000700  |
| C | 1.796000  | 1.537300  | 0.000300  |
| C | 2.737100  | 2.569200  | 0.000400  |
| H | 2.407600  | 3.598900  | 0.000600  |
| C | 4.086200  | 2.248600  | 0.000300  |
| H | 4.833500  | 3.030000  | 0.000300  |
| C | 4.461300  | 0.911000  | 0.000100  |
| H | 5.500500  | 0.616500  | 0.000000  |
| C | 3.462200  | -0.056800 | 0.000100  |
| H | 3.713100  | -1.110300 | -0.000100 |

33

1 monomer, S1, E = -917.774368084 a.u.

|    |           |           |           |
|----|-----------|-----------|-----------|
| In | -0.294800 | -1.340500 | 0.033000  |
| O  | 2.073800  | -1.319800 | -0.374000 |
| N  | 0.503100  | 0.798700  | 0.029400  |
| N  | -2.151400 | 0.249200  | 0.156900  |
| C  | -0.268600 | -2.158000 | 2.048900  |
| H  | 0.013500  | -1.379400 | 2.756800  |
| H  | 0.449900  | -2.974100 | 2.114700  |
| H  | -1.255300 | -2.536300 | 2.315400  |
| C  | -0.790800 | -2.114500 | -1.938900 |
| H  | -0.119200 | -2.931200 | -2.201300 |
| H  | -0.685200 | -1.319600 | -2.676900 |
| H  | -1.817400 | -2.479400 | -1.958800 |
| C  | 2.672800  | -0.196200 | -0.233300 |
| C  | 4.086200  | -0.076800 | -0.285000 |
| H  | 4.657200  | -0.964900 | -0.519900 |
| C  | 4.712000  | 1.138800  | -0.029700 |
| H  | 5.790200  | 1.212000  | -0.071100 |
| C  | 3.949800  | 2.258000  | 0.272600  |

|   |           |           |           |
|---|-----------|-----------|-----------|
| H | 4.426900  | 3.209300  | 0.462600  |
| C | 2.535800  | 2.175700  | 0.319600  |
| H | 1.968900  | 3.056900  | 0.588000  |
| C | 1.891800  | 0.999000  | 0.025000  |
| C | -0.350800 | 1.779200  | -0.160500 |
| H | -0.014100 | 2.784200  | -0.398700 |
| C | -1.752500 | 1.538100  | -0.084700 |
| C | -2.698400 | 2.570200  | -0.243400 |
| H | -2.355500 | 3.576600  | -0.443400 |
| C | -4.041500 | 2.285300  | -0.132600 |
| H | -4.778900 | 3.067700  | -0.247200 |
| C | -4.437600 | 0.963400  | 0.130600  |
| H | -5.479300 | 0.694500  | 0.225400  |
| C | -3.454700 | -0.007400 | 0.258000  |
| H | -3.727000 | -1.039500 | 0.445200  |

33

1 monomer, T1, E = -917.733096653 a.u.

|    |           |           |           |
|----|-----------|-----------|-----------|
| In | -0.289400 | -1.327200 | 0.000000  |
| O  | 2.113200  | -1.361900 | -0.000000 |
| N  | 0.525500  | 0.794500  | 0.000000  |
| N  | -2.149100 | 0.232100  | 0.000000  |
| C  | -0.519000 | -2.136800 | 2.007300  |
| H  | -0.276600 | -1.368400 | 2.740800  |
| H  | 0.148300  | -2.985700 | 2.151400  |
| H  | -1.545600 | -2.465200 | 2.168000  |
| C  | -0.519000 | -2.136800 | -2.007300 |
| H  | 0.148400  | -2.985600 | -2.151400 |
| H  | -0.276700 | -1.368400 | -2.740800 |
| H  | -1.545600 | -2.465300 | -2.168000 |
| C  | 2.683700  | -0.229600 | -0.000000 |
| C  | 4.104400  | -0.103200 | -0.000000 |
| H  | 4.683600  | -1.016700 | -0.000000 |
| C  | 4.701600  | 1.130300  | -0.000000 |
| H  | 5.779300  | 1.218100  | -0.000000 |
| C  | 3.906200  | 2.299300  | 0.000000  |
| H  | 4.391100  | 3.266600  | 0.000000  |
| C  | 2.525100  | 2.240500  | 0.000000  |
| H  | 1.962700  | 3.162100  | 0.000000  |
| C  | 1.859100  | 0.999400  | 0.000000  |
| C  | -0.374400 | 1.816400  | -0.000000 |
| H  | -0.052900 | 2.849000  | -0.000000 |
| C  | -1.754600 | 1.544800  | -0.000000 |
| C  | -2.723900 | 2.580200  | -0.000000 |
| H  | -2.394500 | 3.610400  | -0.000000 |
| C  | -4.060200 | 2.261400  | -0.000000 |
| H  | -4.807900 | 3.042800  | -0.000000 |
| C  | -4.444500 | 0.911400  | 0.000000  |
| H  | -5.484000 | 0.619200  | 0.000000  |

|   |           |           |          |
|---|-----------|-----------|----------|
| C | -3.448100 | -0.054900 | 0.000000 |
| H | -3.706400 | -1.107400 | 0.000000 |

35

4 monomer, S0, E = -1122.38542224 a.u.

|    |           |           |           |
|----|-----------|-----------|-----------|
| In | -1.423600 | -1.396600 | 0.000000  |
| O  | 0.697900  | -2.232400 | -0.000100 |
| N  | 0.109900  | 0.407600  | -0.000000 |
| N  | -2.592400 | 0.844400  | 0.000000  |
| C  | -1.989700 | -1.897800 | 2.032700  |
| H  | -1.489700 | -1.221300 | 2.724800  |
| H  | -1.691800 | -2.920500 | 2.259200  |
| H  | -3.067000 | -1.804300 | 2.161700  |
| C  | -1.990100 | -1.898000 | -2.032500 |
| H  | -1.692000 | -2.920600 | -2.259000 |
| H  | -1.490200 | -1.221500 | -2.724700 |
| H  | -3.067400 | -1.804600 | -2.161300 |
| C  | 1.670900  | -1.404900 | -0.000100 |
| C  | 3.026500  | -1.852200 | -0.000100 |
| H  | 3.201300  | -2.919200 | -0.000100 |
| C  | 4.073900  | -0.972600 | -0.000100 |
| H  | 5.094200  | -1.324200 | -0.000100 |
| C  | 3.822300  | 0.411600  | -0.000000 |
| C  | 2.524600  | 0.902100  | -0.000000 |
| H  | 2.381100  | 1.971300  | 0.000000  |
| C  | 1.450800  | 0.023800  | -0.000100 |
| C  | -0.322000 | 1.613700  | -0.000100 |
| H  | 0.342900  | 2.473400  | -0.000100 |
| C  | -1.754400 | 1.895800  | -0.000100 |
| C  | -2.220800 | 3.209600  | -0.000100 |
| H  | -1.518800 | 4.031600  | -0.000100 |
| C  | -3.590500 | 3.434600  | -0.000000 |
| H  | -3.978800 | 4.443400  | -0.000100 |
| C  | -4.449900 | 2.345100  | 0.000000  |
| H  | -5.522400 | 2.473400  | 0.000000  |
| C  | -3.902500 | 1.065000  | 0.000000  |
| H  | -4.541300 | 0.190800  | 0.000100  |
| N  | 4.923100  | 1.336900  | 0.000000  |
| O  | 4.683700  | 2.547100  | 0.000100  |
| O  | 6.070900  | 0.886700  | 0.000000  |

35

4 monomer, S1, E = -1122.37793022 a.u.

|    |           |           |           |
|----|-----------|-----------|-----------|
| In | -1.527400 | -1.291400 | 0.000100  |
| O  | 0.736800  | -2.238100 | -0.001700 |
| N  | 0.071800  | 0.350800  | -0.000300 |
| N  | -2.608400 | 0.860700  | 0.000700  |
| C  | -1.987200 | -1.948600 | 2.018600  |
| H  | -1.456000 | -1.321300 | 2.733500  |
| H  | -1.680400 | -2.984200 | 2.157200  |

|   |           |           |           |
|---|-----------|-----------|-----------|
| H | -3.057700 | -1.868700 | 2.204600  |
| C | -1.989900 | -1.947800 | -2.017900 |
| H | -1.683300 | -2.983300 | -2.157400 |
| H | -1.459700 | -1.320300 | -2.733300 |
| H | -3.060700 | -1.867800 | -2.202500 |
| C | 1.695200  | -1.417500 | -0.001200 |
| C | 3.056600  | -1.856900 | -0.001400 |
| H | 3.237700  | -2.922100 | -0.002400 |
| C | 4.095400  | -0.955500 | -0.000200 |
| H | 5.123500  | -1.280800 | -0.000400 |
| C | 3.801200  | 0.407300  | 0.001100  |
| C | 2.479500  | 0.903000  | 0.001200  |
| H | 2.339800  | 1.971000  | 0.002500  |
| C | 1.419900  | 0.022700  | -0.000100 |
| C | -0.343700 | 1.608400  | -0.001400 |
| H | 0.351700  | 2.439900  | -0.002900 |
| C | -1.729800 | 1.910900  | -0.000900 |
| C | -2.198500 | 3.242100  | -0.001900 |
| H | -1.483900 | 4.053900  | -0.003200 |
| C | -3.553900 | 3.486100  | -0.001300 |
| H | -3.927100 | 4.500800  | -0.002000 |
| C | -4.441500 | 2.400300  | 0.000400  |
| H | -5.511600 | 2.545400  | 0.001000  |
| C | -3.914800 | 1.115400  | 0.001300  |
| H | -4.572600 | 0.254500  | 0.002500  |
| N | 4.893600  | 1.357800  | 0.002200  |
| O | 4.614400  | 2.558400  | 0.003100  |
| O | 6.049500  | 0.932200  | 0.002300  |

35

4 monomer, T1, E = -1122.32561489 a.u.

|    |           |           |           |
|----|-----------|-----------|-----------|
| In | -1.501600 | -1.304600 | 0.000100  |
| O  | 0.732400  | -2.262800 | 0.000600  |
| N  | 0.095200  | 0.336000  | 0.000200  |
| N  | -2.585900 | 0.864200  | -0.000200 |
| C  | -1.984000 | -1.943000 | 2.019100  |
| H  | -1.429300 | -1.336300 | 2.733700  |
| H  | -1.716100 | -2.989300 | 2.157200  |
| H  | -3.050600 | -1.823000 | 2.205200  |
| C  | -1.983000 | -1.943500 | -2.018800 |
| H  | -1.715500 | -2.990000 | -2.156400 |
| H  | -1.427600 | -1.337400 | -2.733400 |
| H  | -3.049400 | -1.823100 | -2.205700 |
| C  | 1.683100  | -1.443800 | 0.000400  |
| C  | 3.051000  | -1.866700 | 0.000400  |
| H  | 3.243400  | -2.930100 | 0.000700  |
| C  | 4.070100  | -0.962300 | 0.000000  |
| H  | 5.101600  | -1.276400 | 0.000000  |
| C  | 3.769300  | 0.421600  | -0.000400 |

|   |           |          |           |
|---|-----------|----------|-----------|
| C | 2.481700  | 0.915300 | -0.000400 |
| H | 2.334600  | 1.981600 | -0.000700 |
| C | 1.392100  | 0.015700 | 0.000000  |
| C | -0.337300 | 1.637800 | 0.000300  |
| H | 0.362400  | 2.461400 | 0.000600  |
| C | -1.712800 | 1.920200 | 0.000100  |
| C | -2.200300 | 3.251800 | 0.000300  |
| H | -1.494800 | 4.071000 | 0.000600  |
| C | -3.556300 | 3.478700 | 0.000200  |
| H | -3.941000 | 4.489300 | 0.000300  |
| C | -4.433000 | 2.386100 | -0.000200 |
| H | -5.504300 | 2.520700 | -0.000300 |
| C | -3.892000 | 1.105000 | -0.000400 |
| H | -4.541000 | 0.237500 | -0.000600 |
| N | 4.876200  | 1.366400 | -0.000700 |
| O | 4.618600  | 2.568100 | -0.001000 |
| O | 6.022900  | 0.921000 | -0.000800 |
